# Supplementary material for: Comparative Transcriptomic Analysis of Gossypium hirsutum Fiber Development in Mutant Materials (xin w 139) Provides New Insights into Cotton Fiber Development
Source: Plants (Basel). 2024 Apr 17;13(8):1127. doi: 10.3390/plants13081127 (PMC11054599; doi:10.3390/plants13081127)
Supplement: Supplementary file 1 [file plants-13-01127-s001.zip]

Archive with 7 entries (7 files):
- Fig S1.pdf
- Fig S2.jpg
- Fig S3.pdf
- Fig S4.pdf
- Table S1.xlsx
- Table S2.xlsx
- Table S3.xlsx
