# Supplementary material for: Comparative Transcriptomic Analysis of Gossypium hirsutum Fiber Development in Mutant Materials (xin w 139) Provides New Insights into Cotton Fiber Development
Source: Plants (Basel). 2024 Apr 17;13(8):1127. doi: 10.3390/plants13081127 (PMC11054599; doi:10.3390/plants13081127)
Supplement: Supplementary file 1 [file plants-13-01127-s001.zip › Table S1.xlsx]

## Sheet: Sheet1
Table S1.All primers used in this study
gene_id	Forward primer	Reverse primer
GH_A01G0708	ACGACGTCATGGGCTCATTT	GGCCATGACTACCTCCACAG
GH_A02G1777	TGGGCTAAGTTCCGATTCCG	CCCTTTGGCCATCCTTCCAT
GH_A03G1063	TCCCTGCGAGATTGCCTATG	CCAACAACTAAGCGGAAGCC
GH_A04G1140	TGCCCATATTGTGCCGACTT	AGAATGTCAGCATTGCCCCA
GH_A06G0182	TAGAAGAGTTGAGTCTCAGACGAG	ATGTTTCTCATCCGTCCATTCAG
GH_A08G1821	TCAACGGAACTCATCACGCA	TCGCCTTGATCAGCAGTGTT
GH_A12G0641	ATTGCTGCTCATCCTTGGCA	GTCGAGCTCGTACTTGACCT
GH_A12G1715	GAAGGCGACGATGAAGATGA	AGGACTTCGTCCGCTCGGTA
GH_A13G2132	AGTTGCAGTTGCCCCAACTG	CAATTGCCTTGGCAGCTTCG
GH_D05G1364	TGCCCTGGAATACTCTCATG	ACAATCCTCAGTTCACACCCT
GH_D05G3074	CCAGATTGGAGATCAGCGCA	TGACCGGCATAACCTGTTGG
GH_D10G0873	TCGACGTTCAGGTGACGAAA	TCTCTCTGGGGTCCAAAGCA
GH_D13G0161	TTGGCGAAGCAAGTTTGTGG	TCGATCTTGCCGCTTCCAAT
GhUBQ7	GACCTACACCAAGCCCAAGAAG	TGAGCCCACACTTACCACAATAGT
