# Supplementary material for: Comparative Transcriptomic Analysis of Gossypium hirsutum Fiber Development in Mutant Materials (xin w 139) Provides New Insights into Cotton Fiber Development
Source: Plants (Basel). 2024 Apr 17;13(8):1127. doi: 10.3390/plants13081127 (PMC11054599; doi:10.3390/plants13081127)
Supplement: Supplementary file 1 [file plants-13-01127-s001.zip › Table S2.xlsx]

## Sheet: Sheet1
Table S2 Summary statistics for RNA-seq analysis of cotton fibers samples from G．hirsutum
Sample	Raw Reads	Clean Reads	Clean Base(G)	Q20(%)	Q30(%)	GC Content(%)	alignment rate(%)
Xin W 139-0DPA-1	49558226	48569418	7.29	97.6	92.99	43.76	98.13
Xin W 139-0DPA-2	50486376	49588378	7.44	97.58	92.93	43.6	98.1
Xin W 139-0DPA-3	48039438	47177748	7.08	97.32	92.39	43.76	98.06
Xin W 139-5DPA-1	49209692	48167566	7.23	97.29	92.33	44.07	97.97
Xin W 139-5DPA-2	45902878	45016180	6.75	97.33	92.41	44.24	98.05
Xin W 139-5DPA-3	49737380	48809656	7.32	97.42	92.63	44.34	97.99
Xin W 139-10DPA-1	51528780	50527946	7.58	97.27	92.32	44.46	97.84
Xin W 139-10DPA-2	45384014	44481464	6.67	97.36	92.48	44.39	98.28
Xin W 139-10DPA-3	49260576	48314746	7.25	97.29	92.34	44.32	98.07
Xin W 139-15DPA-1	48484104	47567028	7.14	97.31	92.41	44.53	98.12
Xin W 139-15DPA-2	50505792	48929632	7.34	97.76	93.36	43.97	98.15
Xin W 139-15DPA-3	55592026	54407970	8.16	97.62	93.09	44.5	98.19
Xin W 139-20DPA-1	48367142	47144674	7.07	97.54	92.95	44.43	97.91
Xin W 139-20DPA-2	49754646	48599388	7.29	97.52	92.91	44.29	97.9
Xin W 139-20DPA-3	51507232	50316528	7.55	97.54	92.95	44.38	97.89
Xin W 139-25DPA-1	49281444	48045982	7.21	97.58	93	44.54	98.11
Xin W 139-25DPA-2	54210394	52818256	7.92	97.62	93.12	44.89	98.12
Xin W 139-25DPA-3	51195066	49831838	7.47	97.53	92.92	44.94	98.13
Xin W 139-30DPA-1	45389016	44235008	6.64	98.35	94.93	44.27	98.04
Xin W 139-30DPA-2	49106526	47944208	7.19	98.29	94.75	44.28	97.94
Xin W 139-30DPA-3	51176062	49071638	7.36	97.57	93.05	44.19	97.9
xin w 139-0DPA-1	51971950	50850818	7.63	97.43	92.65	43.7	98.33
xin w 139-0DPA-2	57228736	56122780	8.42	97.37	92.51	43.74	98.32
xin w 139-0DPA-3	54151692	53069484	7.96	97.42	92.6	43.82	98.36
xin w 139-5DPA-1	57831170	56676624	8.5	97.39	92.57	44.26	98.45
xin w 139-5DPA-2	55983220	54482986	8.17	97.57	92.98	44.29	98.44
xin w 139-5DPA-3	47574686	46569460	6.99	97.4	92.55	44.42	97.04
xin w 139-10DPA-1	50486872	49488018	7.42	97.35	92.47	44.49	98.4
xin w 139-10DPA-2	46801914	45771680	6.87	97.28	92.32	44.55	98.35
xin w 139-10DPA-3	47457368	46432756	6.96	97.35	92.47	44.59	98.39
xin w 139-15DPA-1	51558844	50282584	7.54	97.31	92.39	44.4	98.02
xin w 139-15DPA-2	51398488	49984460	7.5	97.35	92.47	44.34	98.08
xin w 139-15DPA-3	53415870	52125380	7.82	97.34	92.45	44.38	98.16
xin w 139-20DPA-1	52192256	51030802	7.65	97.28	92.34	44.15	98.12
xin w 139-20DPA-2	47175382	46411966	6.96	97.3	92.4	44.34	98.13
xin w 139-20DPA-3	48435284	47492026	7.12	97.31	92.44	44.36	98.16
xin w 139-25DPA-1	48492772	47616382	7.14	97.3	92.38	43.86	98
xin w 139-25DPA-2	50008802	49212644	7.38	97.42	92.63	43.87	97.94
xin w 139-25DPA-3	50260368	49396358	7.41	97.37	92.53	43.79	98
xin w 139-30DPA-1	46909938	45855350	6.88	97.34	92.46	43.68	97.82
xin w 139-30DPA-2	50363018	49333660	7.4	97.36	92.51	43.9	97.85
xin w 139-30DPA-3	48171788	47242064	7.09	97.42	92.63	43.56	97.88
