# Supplementary material for: Comparative Transcriptomic Analysis of Gossypium hirsutum Fiber Development in Mutant Materials (xin w 139) Provides New Insights into Cotton Fiber Development
Source: Plants (Basel). 2024 Apr 17;13(8):1127. doi: 10.3390/plants13081127 (PMC11054599; doi:10.3390/plants13081127)
Supplement: Supplementary file 1 [file plants-13-01127-s001.zip › Table S3.xlsx]

## Sheet: Sheet1
Table S3 Expression levels of 523 PPR protein genes encoding in all DEGs
gene_id	Xin W 139 0DPA	Xin W 139 5DPA	Xin W 139 10DPA	Xin W 139 15DPA	Xin W 139 20DPA	Xin W 139 25DPA	Xin W 139 30DPA	xin w 139 0DPA	xin w 139 5DPA	xin w 139 10DPA	xin w 139 15DPA	xin w 139 20DPA	xin w 139 25DPA	xin w 139 30DPA
GH_A01G0063	7.4448	6.03237	3.76647	2.16127	3.0688	2.89607	0.9371	6.40973	4.4048	3.85127	2.35383	2.19403	2.93953	2.43147
GH_A01G0160	1.078	0.938233	0.7584	0.525933	0.845067	0.679967	0.205767	1.96077	1.40843	1.04063	0.696167	0.673067	0.987033	0.893233
GH_A01G0209	0.616633	0.783533	0.684833	0.596433	0.666567	0.496567	0.2622	1.12337	1.37623	1.1166	0.616	0.453333	0.358667	0.843767
GH_A01G0319	4.86263	3.4854	3.02573	1.7823	2.29977	2.6777	0.8076	4.15607	4.176	3.4766	2.23023	2.1113	1.86053	1.47883
GH_A01G0328	4.05657	2.274	1.65427	0.696467	1.40033	1.38303	0.170167	3.93123	3.70547	2.24863	1.0587	1.21937	1.32477	1.3321
GH_A01G0623	3.14003	2.35357	1.58373	1.09567	1.18467	0.6132	0.183567	4.09687	2.33817	1.32317	1.2704	0.908933	1.551	0.987867
GH_A01G0720	3.96537	2.42117	1.67383	1.12557	1.19533	0.938967	0.5963	3.64123	2.13963	1.20893	1.1135	1.3499	3.1829	2.3948
GH_A01G1323	0.6183	1.15313	0.915267	0.737033	0.689567	0.515233	0.436467	0.960967	1.03217	0.894533	0.756967	0.585567	0.419367	0.395033
GH_A01G1827	0.510833	1.01	0.572567	0.263333	0.4225	0.427233	0.166367	0.6344	0.7089	0.6151	0.4183	0.260033	0.310533	0.411767
GH_A01G2090	59.605	93.0147	36.9206	15.858	17.1602	16.9119	7.2804	54.9953	68.6228	41.6331	18.5413	16.5537	18.1798	13.05
GH_A01G2135	4.24447	1.05953	1.27883	0.4753	1.2497	0.497433	0.197967	2.60583	1.50577	0.5055	0.614567	1.1167	1.54473	1.23167
GH_A01G2213	3.61043	3.45057	2.3581	1.53227	1.83203	1.51063	0.456	3.8901	4.2098	2.8292	1.41107	1.19107	1.38563	1.48563
GH_A01G2222	0.7117	1.072	0.5765	0.5663	0.336767	0.493567	0.188767	0.934533	0.927733	0.601067	0.716367	0.2718	0.5622	0.336667
GH_A01G2282	2.89907	2.09153	2.57623	1.32837	1.25603	1.31463	0.322233	3.67643	3.04117	2.5168	1.28233	1.09337	1.20513	0.929067
GH_A01G2499	3.26523	2.03817	1.4658	1.6779	1.54047	1.08883	0.3907	3.36423	1.97297	2.54757	1.8253	1.05167	1.70907	2.2607
GH_A02G0018	10.0434	11.0737	7.37823	3.28013	5.13417	4.56687	1.3677	7.77377	9.74473	7.73433	3.5573	3.14333	3.70027	4.38043
GH_A02G0038	0.825533	0.561933	0.649633	0.1009	0.1898	0.3835	0.0221667	0.9293	0.4991	0.4892	0.247867	0.159167	0.284767	0.199467
GH_A02G0077	3.3768	2.615	2.61957	1.66183	1.3946	1.4436	0.409967	2.56977	2.92617	3.03597	2.0681	1.3889	1.2338	1.36313
GH_A02G0116	1.5946	1.76837	2.39103	5.2632	2.9881	2.10257	2.72383	1.50747	2.07457	2.83357	3.75693	2.2109	1.3442	1.8519
GH_A02G0155	2.1167	1.37303	1.00473	0.62	0.824267	0.749967	0.582167	1.69423	1.02213	0.8741	0.521333	0.6621	1.8062	1.56143
GH_A02G0156	2.21523	1.66077	1.19577	0.8179	0.738733	0.7396	0.2585	1.5682	1.2843	0.913567	0.757667	1.19373	1.40633	0.962833
GH_A02G0202	4.14107	3.83823	2.55933	1.7282	1.47777	2.11183	0.6709	3.17653	3.59147	2.76957	2.0112	1.50847	1.21467	1.32533
GH_A02G1036	1.7557	1.66473	1.64323	2.32883	0.819933	0.651833	0.430367	1.2853	1.73327	1.49757	1.9813	0.986167	0.581633	0.740733
GH_A02G1212	1.43757	1.25563	0.7298	0.535333	0.9851	0.738967	0.135067	1.0984	1.07717	0.8052	0.669633	0.6443	0.6185	0.475367
GH_A02G1467	2.40583	1.64163	1.27893	0.5936	1.2418	1.01477	0.0978	2.7579	1.9727	1.7134	0.710167	0.7242	0.851267	1.0032
GH_A02G1492	1.3386	1.07333	0.7131	0.774267	0.713467	0.5325	0.109767	1.5162	1.20483	0.8173	0.980667	0.674967	0.8731	1.08387
GH_A02G1642	4.25573	2.27867	1.5388	0.823633	0.9453	0.973233	0.254967	3.9742	2.10723	1.5508	1.04417	1.15953	2.4937	2.2596
GH_A02G1942	3.59687	4.6271	4.8653	5.22593	3.893	2.70257	2.2283	5.17557	5.9707	5.9915	5.8453	4.0407	2.20297	2.3849
GH_A02G1995	3.8168	2.72263	1.62613	2.14133	2.0953	2.34213	0.519767	3.25597	4.13903	2.91313	2.8335	1.6272	1.8845	2.09243
GH_A03G0438	4.79343	3.01587	1.7052	1.27467	0.933233	1.59793	0.8271	9.32057	3.31577	2.0817	1.37533	2.15477	3.8111	3.1906
GH_A03G0502	3.63867	2.56943	1.9798	1.2512	1.18933	1.36097	0.322133	3.8406	2.86977	2.03743	1.1995	1.2791	0.9167	0.734067
GH_A03G0578	6.76693	3.7983	3.97623	2.09753	3.86713	2.7727	1.19747	5.62673	3.51573	2.7907	2.4282	2.98	4.24513	5.40233
GH_A03G0689	7.9084	6.91943	6.20927	3.3087	6.1406	5.2955	1.5575	6.45907	6.3776	5.3855	2.87593	3.81477	3.80223	4.36017
GH_A03G0708	1.88567	1.35213	0.850267	0.609933	0.566333	0.361067	0.308133	1.61087	1.04283	1.1108	0.868467	0.5847	1.1543	1.1222
GH_A03G0792	8.69203	5.53697	5.11453	2.24287	3.8363	3.40047	0.623833	7.729	6.43893	5.71843	3.806	2.86337	2.6239	2.15943
GH_A03G0802	1.35393	0.9265	0.634467	0.444933	0.691967	0.690333	0.1101	1.99767	1.51037	0.9824	0.377933	0.472833	0.557567	0.4532
GH_A03G1138	1.43677	1.04793	0.675167	0.3363	0.5734	0.4605	0.188333	2.00087	1.51773	0.843867	0.276867	0.495167	0.761767	0.862933
GH_A03G1214	0.721967	0.3372	0.496	0.295433	0.144833	0.1918	0.0102333	1.1806	0.826167	0.5325	0.414867	0.232567	0.253	0.111833
GH_A03G1226	23.9739	31.9465	23.3648	11.6623	15.3499	16.0305	5.50947	23.3456	32.5118	24.4762	13.6178	13.1556	15.0665	15.1018
GH_A03G1441	4.01963	3.36473	3.23717	2.3756	1.6603	2.0017	0.677333	3.82127	4.0453	2.96497	2.3231	1.71667	2.21217	2.3881
GH_A03G1595	0.9956	1.1096	0.8689	0.303133	0.239867	0.3578	0.259933	0.826467	1.02593	0.668133	0.4722	0.378633	0.308667	0.387133
GH_A03G1705	2.5923	1.75447	1.41813	0.767867	0.8351	0.946867	0.254367	2.24563	2.62267	1.6644	0.902367	0.885267	0.9134	0.7833
GH_A03G1823	4.19683	2.14533	1.37733	0.6796	0.7801	0.7682	0.2038	3.65563	2.11747	1.4917	0.6806	1.1595	1.06077	0.5576
GH_A03G1830	1.42693	1.24383	0.871433	0.4885	0.606633	0.995733	0.1264	1.47227	1.25413	1.04117	0.536067	0.8833	0.699867	0.4367
GH_A03G1893	2.08297	3.17043	2.53393	1.156	1.50177	1.27277	0.374567	1.94923	2.98977	2.27317	1.5167	1.14043	0.848267	0.929333
GH_A03G1933	2.63027	1.1497	1.36843	1.22593	1.0678	0.938533	0.409867	3.67413	2.96603	1.75737	2.0707	1.0547	1.30553	1.71523
GH_A03G2179	6.53497	3.18233	2.38227	0.649933	0.9616	1.24353	0.616967	6.44613	3.581	2.2731	0.850833	1.3132	3.33757	2.8678
GH_A03G2273	4.3783	2.6461	2.5567	1.26597	1.62757	1.74447	0.526467	4.16183	3.7475	3.43967	1.56283	1.49897	1.35837	1.2048
GH_A04G0049	3.7189	2.41473	2.28867	1.4035	2.78337	2.06673	0.728667	3.50537	3.2294	2.68103	2.07427	2.04047	1.851	2.04737
GH_A04G0475	3.86993	2.6329	2.52593	2.6156	5.95903	6.65707	3.0038	5.38943	3.19553	2.81173	3.318	4.0893	5.9771	5.92027
GH_A04G0779	4.77107	2.73083	2.21147	0.4444	0.9008	1.08253	0.2454	4.37323	3.23223	2.2634	1.5649	0.7435	1.09537	0.648233
GH_A04G1172	4.5467	1.6213	0.7538	0.438967	1.0041	0.7061	0.204233	3.56	1.83	1.27517	0.6326	1.96553	1.11047	0.992967
GH_A04G1294	1.4023	0.9295	0.5552	0.3949	0.690933	0.369433	0.122233	1.24323	1.34043	0.4623	0.4515	0.259333	0.300967	0.3249
GH_A04G1409	6.2778	5.17843	3.38117	2.66483	2.43307	2.01743	1.2233	6.2032	3.82813	2.9087	3.4021	2.8523	6.53257	6.33187
GH_A04G1436	2.1567	2.03813	1.85767	0.965	1.2128	1.158	0.226433	2.02797	1.81013	1.9915	1.2944	0.5612	1.02063	0.875067
GH_A04G1525	2.29577	1.5183	1.05563	0.564333	0.470767	0.735667	0.2344	1.94453	1.49003	0.753033	0.5138	0.439233	0.713933	0.547033
GH_A05G0026	4.93223	5.0669	4.39207	3.4132	2.10597	1.36423	1.5928	4.2671	4.9492	4.5133	3.66633	2.24023	1.96843	1.5555
GH_A05G0036	9.3733	7.57603	7.6452	4.35197	4.07483	5.4556	1.2335	10.3789	8.72853	8.52453	5.30443	3.4072	3.9783	4.07983
GH_A05G0050	1.71537	1.52033	0.798867	0.399067	0.422633	0.478667	0.202867	1.5664	1.143	0.794333	0.9333	0.934167	0.990533	0.771167
GH_A05G0203	1.83467	1.94757	1.46387	0.578533	1.32273	1.0552	0.282633	1.60413	1.81403	1.0381	0.9095	0.750367	1.16177	0.7288
GH_A05G0210	3.072	2.0921	2.7235	1.82257	5.41397	5.29567	1.30627	3.91947	2.54847	3.47207	1.67627	2.25183	4.01467	4.3939
GH_A05G0614	5.2162	3.7275	3.10107	1.61817	2.5169	3.0682	0.599967	4.00597	2.7775	2.57393	1.41827	1.8444	2.8565	2.34137
GH_A05G0653	6.10807	1.96813	1.67603	7.81837	9.38167	3.94087	12.4868	7.4125	2.4727	1.84557	2.61813	39.0588	10.1524	7.86257
GH_A05G0686	2.66947	3.01127	2.02023	2.4837	1.2948	1.17053	0.7445	1.9517	2.66997	2.14967	1.63613	1.10783	0.7568	0.795033
GH_A05G0746	0.682	0.165967	0.213133	0.2997	0.164233	0.208933	0.0694667	0.567833	0.4254	0.174933	0.227233	0.161433	0.2448	0.215467
GH_A05G0898	1.82513	2.52573	2.00993	1.51387	2.21377	1.62303	0.314567	2.1004	2.28133	1.79553	1.50217	1.45043	1.4958	1.29617
GH_A05G0927	13.3168	6.86323	4.40593	3.51013	4.34643	5.21253	1.45037	10.8001	7.06243	4.85977	5.03643	3.4255	4.5373	3.50507
GH_A05G1236	3.9869	1.96733	1.43707	1.5972	2.33663	1.10217	0.5884	3.60383	3.5344	1.6701	1.63807	2.47963	6.63667	3.6188
GH_A05G1467	4.07357	4.23203	4.30907	1.2757	1.1434	1.15847	0.290567	3.03423	3.19223	3.49967	1.21217	1.03817	1.2908	0.920233
GH_A05G1573	2.35273	1.65233	1.3083	1.40603	1.6014	1.2005	0.3036	2.43537	1.54087	1.55127	0.979133	1.3503	1.11113	1.14423
GH_A05G1648	2.97543	1.61153	1.3814	0.994933	1.0028	1.38963	0.431733	2.55183	2.2131	1.52023	0.987167	1.21247	0.982833	0.899167
GH_A05G1649	9.58317	5.07467	2.2804	0.9038	1.4154	2.16267	0.836967	10.8908	4.4906	2.0621	0.880833	1.1719	4.8409	3.0877
GH_A05G1898	0.4197	0.420867	1.28183	2.3227	11.205	6.21577	0.937867	0.4486	0.3707	0.655467	1.1059	5.30783	4.65517	9.0227
GH_A05G2128	6.47717	3.69053	2.9044	3.96343	5.71907	4.20043	4.46903	6.2806	4.43543	3.75233	3.9776	12.9335	5.13643	6.85733
GH_A05G2305	1.89563	0.917167	1.01103	0.562167	0.839133	0.6411	0.342833	2.38787	1.42257	1.19323	0.566467	0.8104	1.2891	1.49727
GH_A05G2456	2.34573	2.6167	2.14527	1.3913	1.85223	2.1772	0.7766	2.10613	2.3728	2.03893	1.2199	1.1273	1.89413	1.79923
GH_A05G2536	1.52653	0.738833	1.2778	0.9576	0.765433	0.603367	0.206433	1.71727	1.34603	1.45923	1.3442	0.583933	0.810533	0.647033
GH_A05G2888	1.0285	1.2998	0.543067	0.4176	0.3964	0.541133	0.135267	0.613233	0.784	0.506767	0.268933	0.382033	0.330267	0.405933
GH_A05G3177	1.77123	1.54073	1.64047	1.08603	0.953767	0.783233	0.271033	1.8484	1.703	2.01967	1.84617	0.7187	0.442567	0.611
GH_A05G3536	3.3426	3.43997	3.59607	2.83347	2.33903	2.95077	1.1037	2.95363	3.66697	3.44093	2.8912	1.95837	1.72423	1.5702
GH_A05G3543	7.05747	3.62177	2.5889	0.9789	2.383	2.23763	0.536267	7.97617	3.35033	2.46173	1.2133	1.72887	4.8546	3.41133
GH_A05G3587	3.98107	3.3292	2.1048	0.733867	0.753333	1.6599	0.233	5.89873	3.31083	2.4933	1.38103	0.855	1.47573	1.51167
GH_A05G3895	1.8248	1.11423	0.815167	0.400733	0.8126	0.659367	0.1429	1.1861	1.0721	0.753867	0.519133	0.448167	0.729667	0.745933
GH_A05G3898	1.21617	0.836533	0.801933	0.479533	0.5017	0.616133	0.110067	1.0852	0.844933	0.4409	0.207533	0.301867	0.314167	0.300033
GH_A05G4092	2.61277	2.15367	1.12013	0.3704	0.675767	0.566767	0.251767	3.08303	1.83437	0.949	0.764567	0.965067	1.67433	1.82693
GH_A05G4248	1.5402	0.952533	0.885433	0.351233	0.474667	0.628133	0.5195	1.71323	1.06033	0.533767	0.370433	0.693033	1.47037	1.47727
GH_A05G4264	2.33173	1.5169	0.923833	0.530567	0.534567	0.512433	0.287667	2.67367	1.88033	1.34597	0.4129	0.533767	0.642933	0.4343
GH_A06G0011	3.29097	2.9118	2.3723	3.1242	6.9203	6.39443	7.85167	2.72797	3.29467	2.9244	3.5229	5.0839	5.24507	6.96767
GH_A06G0306	0.155667	0.101833	0.0816333	0.581	0.0462	0.189667	0.0142	0.109467	0.0809667	0.1122	0.465467	0.0808	0.2163	0.112433
GH_A06G0308	13.7174	9.6303	7.72843	4.70447	7.56457	8.92853	2.39317	11.1365	11.6589	8.87217	5.06777	5.62197	6.41073	6.85673
GH_A06G0507	2.27227	2.0045	1.18817	0.767767	0.5624	0.5309	0.416367	1.64533	1.8684	1.28703	1.0462	0.948567	1.48853	0.986933
GH_A06G0512	1.3065	3.31253	2.8618	2.99863	1.6873	1.5749	1.04503	1.35717	3.0237	3.0372	3.40397	2.0283	1.37747	1.23297
GH_A06G0684	3.786	0.8966	0.232767	0.3876	0.690633	1.9633	0.937467	2.51333	0.711133	0.604933	0.368933	0.768133	2.68823	5.75793
GH_A06G0712	0.829767	1.04007	1.31797	0.428867	0.3131	0.2963	0.0329667	0.407867	0.789833	0.963533	0.562067	0.4022	0.3228	0.3145
GH_A06G1147	1.6522	1.53317	1.22677	1.0836	1.17187	0.995833	0.3339	1.60943	1.93943	1.03917	1.08313	0.746467	0.727933	0.669533
GH_A06G1214	2.86713	2.18067	2.01103	1.06537	0.990533	1.265	0.306533	3.21203	2.18013	1.85673	1.39743	1.09483	1.05147	1.33073
GH_A06G1373	3.513	2.61083	1.56127	1.5311	1.58483	1.92743	0.700667	2.52483	3.96817	2.3087	2.4577	2.05397	2.1415	1.7674
GH_A06G1432	0.9383	1.13343	0.933633	0.6023	0.502733	0.584533	0.205133	1.1629	1.0695	0.881667	0.746233	0.698733	0.3615	0.4356
GH_A06G1752	3.70183	3.03113	2.4898	1.78197	2.29367	1.92643	0.838033	3.6081	4.6113	2.9126	2.70197	2.62383	1.47583	1.4597
GH_A06G1801	1.12677	0.7474	0.9404	0.478033	0.4032	0.1404	0.0744667	1.34563	1.13383	0.627767	0.881867	0.303233	0.340333	0.1079
GH_A06G1966	2.38343	2.43953	1.87687	0.721233	1.4432	1.05857	0.388433	1.48787	1.98257	1.8709	1.12453	0.879	1.04517	0.8572
GH_A06G1990	2.33347	1.50877	0.9816	0.774467	0.4415	0.436433	0.231433	1.94603	1.4367	0.7975	1.30807	0.648733	1.07013	1.36213
GH_A06G2138	4.00797	2.10693	2.08403	1.3424	1.02263	1.0817	0.404033	3.72657	2.7973	2.8193	1.6871	1.36173	1.95027	2.2214
GH_A06G2153	13.1181	7.9928	5.47167	3.01087	3.6063	4.08757	0.830833	8.74823	7.3829	5.60903	2.6299	3.10763	3.0654	1.9483
GH_A07G0085	1.33273	0.8005	0.426233	0.439233	0.2465	0.297433	0.0737667	1.60443	1.44893	0.593567	0.3205	0.4161	0.281967	0.122967
GH_A07G0286	0.311633	0.5162	0.657633	1.47547	0.424233	0.408967	0.322833	0.648433	0.567567	0.5553	1.95707	0.6193	0.281067	0.380333
GH_A07G0383	2.6461	2.10143	1.31537	0.77	1.1232	1.00377	0.162367	2.53623	2.19997	1.60473	0.661467	0.710533	1.05973	1.0267
GH_A07G0398	1.54323	1.2362	0.814667	0.470067	0.694067	0.517133	0.210867	1.6893	1.5478	1.16743	1.0747	0.542333	0.780633	0.4989
GH_A07G0608	7.1948	4.397	3.5562	1.5736	1.94233	1.55547	0.6486	6.86733	4.82327	3.7055	1.41237	1.4738	1.8355	1.75
GH_A07G0944	4.8726	7.53457	4.34777	2.70363	2.15893	1.4912	1.3257	5.23783	7.35063	5.2727	4.57623	2.92763	1.55427	2.52737
GH_A07G1009	4.11553	3.9639	4.1764	2.2545	3.34877	3.32803	2.2077	4.2024	5.1038	4.53317	2.8373	2.42293	1.89113	1.88637
GH_A07G1077	3.26333	1.6895	1.25767	1.0178	0.660333	0.607	0.1665	3.0231	1.82483	1.08213	1.26877	0.955667	1.11517	0.467267
GH_A07G1195	1.11053	2.62413	1.9352	2.07373	0.3661	0.653033	0.0923667	0.722967	3.27683	3.9114	4.7489	0.513367	0.304867	0.2294
GH_A07G1314	2.5394	2.68093	2.42923	2.4781	1.55583	1.1091	0.807467	2.03577	1.93347	2.17753	3.62737	1.98907	1.16933	1.30687
GH_A07G1347	0.728433	0.751767	0.287367	0.133633	0.2255	0.550567	0.0467667	0.4988	0.723367	0.3554	0.1009	0.2027	0.280933	0.1446
GH_A07G1444	6.90613	9.47413	9.16623	14.6656	13.0976	10.9439	9.77663	6.49873	8.43893	9.67027	13.9886	9.6914	7.57003	8.22863
GH_A07G1499	1.00547	1.45407	2.27507	2.71417	2.15717	3.60767	1.7685	0.951633	1.36197	2.47937	3.28217	2.66807	2.12793	2.0449
GH_A07G1732	1.87143	1.7338	1.48687	0.664	1.617	1.32797	0.485633	1.44763	1.58187	1.39303	0.656367	1.0777	0.8731	1.7693
GH_A07G1870	0.692833	0.702933	0.624867	0.5009	3.8623	1.96643	1.28227	0.555233	0.525733	0.6854	0.526867	1.3426	1.90963	2.42357
GH_A07G1918	2.22253	2.27337	3.20343	3.5851	3.3806	2.98197	2.6933	2.76923	2.6629	3.41007	4.76953	3.88873	2.48723	4.32563
GH_A07G2059	0.613	0.560767	0.585333	0.448867	0.3874	0.374367	0.182033	0.584767	1.19547	0.888533	0.730567	0.392333	0.217533	0.448767
GH_A07G2080	2.62413	2.32723	1.31517	1.1295	1.56477	1.2284	0.425833	1.9548	2.15597	1.43767	1.04073	1.2202	1.103	1.19563
GH_A07G2265	1.11097	0.969133	0.471533	0.272967	0.6084	0.5891	0.0552667	1.17687	1.3721	0.667733	0.223	0.478433	0.587433	0.414767
GH_A07G2331	5.6973	4.72737	3.48683	2.26877	2.31567	1.9642	0.697467	4.24523	4.27117	2.70877	2.8216	2.60767	2.95257	3.10727
GH_A07G2336	1.8148	1.12143	0.698367	0.281	0.6554	0.683267	0.3949	2.09147	1.3504	0.6662	0.323533	0.753133	1.52653	0.871067
GH_A07G2513	0.685267	0.9242	0.883233	0.5161	0.667367	0.4713	0.180767	0.332467	0.318233	0.5355	0.413133	0.235667	0.421033	0.2977
GH_A08G0133	1.59447	1.8001	0.944333	0.881067	0.801367	0.614633	0.2218	1.08553	0.802933	0.725067	0.629633	0.7927	0.7977	0.6637
GH_A08G0189	0.8543	1.10513	1.1474	1.0549	1.02493	0.5825	0.143333	1.67853	1.70773	1.329	0.894067	0.8268	0.4265	0.596167
GH_A08G0221	1.94353	1.37997	1.01643	0.836667	0.744067	0.7137	0.493267	1.28257	0.634033	0.7832	1.18703	1.20137	1.44403	1.34013
GH_A08G0428	2.05897	1.31517	1.2952	1.20573	0.451833	0.506833	0.0867333	1.85357	1.24297	1.35667	1.3932	0.664833	1.98757	1.21563
GH_A08G0502	3.28067	2.63457	1.47663	0.943067	1.3171	1.50243	0.500867	2.94187	2.57393	1.57533	1.1501	1.0708	1.9366	1.38883
GH_A08G0602	0.789867	0.485033	0.284267	0.298633	0.123667	0.232	0.155767	1.2966	0.573933	0.461033	0.227433	0.479267	0.791567	1.05553
GH_A08G0611	3.11843	3.25673	2.42337	1.78713	1.58577	1.09787	0.278467	3.1921	2.16483	2.48143	1.87213	1.54983	1.65253	1.36343
GH_A08G0638	10.8716	7.70797	7.85213	4.9864	8.45177	7.92373	2.5576	9.02833	7.24953	8.06883	5.2409	4.32033	8.24387	7.32903
GH_A08G0655	1.58363	1.38623	1.1574	0.345167	0.665167	0.582167	0.0719667	1.79313	0.9798	0.787567	0.658233	0.619367	0.699833	0.507533
GH_A08G0668	1.22963	0.850267	0.850967	0.599133	0.5987	0.581133	0.0473667	1.3228	0.897	0.506	0.7976	0.636367	0.852867	0.7271
GH_A08G0702	2.34447	1.84847	1.14547	0.569033	0.961867	1.34683	0.306333	2.09937	1.91977	1.28973	0.5043	0.4925	0.9987	0.823433
GH_A08G0743	4.0583	2.38383	1.7003	0.663367	0.945033	0.894967	0.311933	3.6081	2.19513	1.31557	1.12507	0.795233	1.56903	1.41853
GH_A08G0772	4.8467	5.1075	3.35247	1.5024	2.12547	2.0904	0.800433	6.52633	7.20083	4.4318	2.0119	2.42647	3.2983	3.13973
GH_A08G0992	1.94657	3.84083	2.59723	4.09327	1.74743	1.24057	0.788433	2.71183	3.82063	3.12753	4.68717	2.15637	1.5809	1.6741
GH_A08G1432	9.69493	6.6572	4.36547	2.33613	1.4203	1.93407	0.360933	9.24473	10.8734	4.96343	3.5213	1.61303	1.90493	2.38117
GH_A08G1602	10.2173	4.707	2.86323	1.2311	1.75583	1.23057	0.867867	15.3486	4.9351	3.31863	1.24233	1.86527	3.05517	2.496
GH_A08G1786	2.07897	0.8469	0.3347	0.191667	0.150633	1.47247	0.0274	1.35933	0.5924	0.7381	0.104333	0.339467	0.556033	0.404867
GH_A08G1857	1.0987	0.772967	1.06107	0.726433	0.646533	0.408533	0.118	0.917533	0.971833	1.1597	1.19867	0.491633	0.411433	0.480467
GH_A08G1910	2.69927	1.6405	1.8634	0.577533	0.868233	0.7476	0.165367	3.0199	1.6793	1.43973	0.873833	0.647067	0.9507	1.078
GH_A08G2315	2.83763	3.6156	2.299	2.19987	1.5146	1.16097	0.683733	3.1162	5.34097	3.10727	2.7519	1.7035	1.03197	1.60497
GH_A08G2533	1.5419	0.912133	0.474867	0.374233	0.4295	0.418733	0.2309	1.2177	0.6473	0.585	0.745867	0.7183	2.1486	1.51477
GH_A08G2586	1.03827	0.794067	1.064	0.3282	0.2188	0.2925	0.113233	1.24433	1.06893	0.8444	0.509867	0.792433	0.604867	0.674033
GH_A09G0031	5.28313	4.0458	2.5236	1.3502	1.51443	1.40827	0.400767	6.05223	4.81497	2.01553	1.39877	1.14733	1.1262	1.43107
GH_A09G0060	11.2252	9.04777	7.7307	9.80663	5.16207	4.1239	4.25737	9.26217	9.21883	6.45577	8.10167	5.55027	6.38937	5.9676
GH_A09G0114	2.3713	1.48283	1.72367	1.42703	3.31003	2.5154	1.0974	1.96873	1.5341	1.5026	1.30013	2.44053	2.46577	2.57793
GH_A09G0125	1.58387	1.6723	1.18033	3.32773	6.24363	4.09727	4.254	2.26257	1.987	1.54513	1.34477	6.8593	2.9669	3.05477
GH_A09G0293	0.9475	0.730667	0.6999	0.8959	0.989567	0.558867	0.328233	1.2909	1.1467	0.8157	0.6955	0.751267	0.338267	0.557
GH_A09G0555	1.14263	0.557667	0.486267	0.394967	0.566367	0.258767	0.0758333	1.89237	0.675833	0.405633	0.552567	0.375933	0.5751	0.632667
GH_A09G0632	4.90553	4.047	4.27877	6.54383	4.77443	3.7728	5.5284	4.68033	5.2118	3.7156	7.0455	3.47477	4.26937	4.15713
GH_A09G0759	5.52487	4.42237	3.61917	2.37517	2.64737	2.219	0.5965	4.69373	4.60743	3.27157	2.6953	1.70383	2.24153	1.89197
GH_A09G0799	0.350467	0.483233	0.5724	0.486267	0.354233	0.343433	0.263567	0.2888	0.4958	0.385467	0.513133	0.424833	0.359967	0.421567
GH_A09G0829	2.36623	2.12637	1.74267	1.66103	1.5015	1.61723	0.4338	1.97267	2.25037	2.10927	1.4833	1.5367	1.4477	1.75363
GH_A09G0877	8.5989	13.8228	10.3994	9.2988	6.70897	6.9709	2.41337	8.24357	13.8211	10.1903	8.65813	5.70197	4.9862	5.8976
GH_A09G0939	2.13463	1.22083	0.444867	0.0596	0.2003	0.499167	0	1.20157	0.758	0.747633	0.399333	0.188833	0.5324	0.2318
GH_A09G1161	5.9305	3.709	2.48927	1.43917	1.82137	2.276	0.8567	6.2574	5.2024	3.10257	4.1756	2.5396	2.1784	2.01467
GH_A09G1277	2.59657	1.9439	1.75913	0.826933	0.7709	0.851167	0.295567	2.44817	2.46607	2.189	1.24817	0.9593	1.69973	1.72363
GH_A09G1334	4.88577	3.58347	2.08783	0.543367	0.691833	0.745267	0.2479	7.85043	5.51903	2.0254	1.1673	0.96	0.5675	0.530067
GH_A09G1397	1.8641	1.52983	1.3876	1.34653	1.05253	0.8497	0.2762	1.6054	1.54773	2.27317	1.8665	1.2471	1.11917	1.08513
GH_A09G1565	0.6472	0.960833	0.6142	0.407967	0.2437	0.268433	0.1375	1.04437	0.9424	0.479233	0.529967	0.2908	0.2859	0.316033
GH_A09G1690	8.75933	3.37773	2.2189	0.9935	1.52283	1.5437	0.554533	8.54393	3.3095	2.63317	1.50513	1.51443	2.52677	2.476
GH_A09G1762	2.4117	1.7001	1.85193	1.72493	1.70933	1.84963	0.657733	3.50593	2.51853	1.86797	1.30453	1.65627	1.22243	1.3325
GH_A09G2243	1.887	1.08753	0.759133	0.889133	1.17273	0.897133	0.651567	3.12507	2.33897	1.99387	1.01027	0.6285	1.06083	1.3656
GH_A09G2636	3.62927	3.0863	2.07403	0.681567	1.65283	1.80223	0.459433	4.4095	3.72673	2.22977	1.07107	1.16273	1.92887	1.93223
GH_A10G0134	3.421	5.37273	4.06833	2.22977	3.09207	3.12453	0.565467	6.65287	7.3307	6.63953	3.67097	2.40523	2.07267	1.94367
GH_A10G0442	1.11063	0.935233	0.652967	0.520967	0.4155	0.424667	0.163	0.734167	0.662833	0.6639	0.7785	0.344933	0.4371	0.452867
GH_A10G0451	3.0688	2.85003	1.8866	1.13347	2.00217	1.38333	0.423733	2.89263	1.9642	1.80903	1.18113	1.06143	1.85337	1.7191
GH_A10G0457	0.167067	0.0182667	0.0191667	0.2386	0.190233	0.750533	1.0813	0.0565667	0	0.0191	0.0432	0.2411	0.3774	0.4809
GH_A10G0730	7.8226	4.06973	2.67567	0.9637	2.2935	2.41293	0.8092	7.5093	4.16723	2.2962	1.51703	2.11347	3.4228	3.18187
GH_A10G1101	1.16227	1.00273	0.681767	0.514733	0.8917	0.498233	0.166867	1.3272	0.9708	0.852633	0.618667	0.823367	0.5753	0.8132
GH_A10G1266	1.9735	1.89143	2.0391	0.9942	1.35583	1.24873	0.315333	2.7654	2.71903	2.42113	1.22847	0.943933	0.9743	0.9698
GH_A10G1924	12.1095	8.52797	5.08617	1.81553	2.28587	4.05453	0.2789	13.7959	8.35027	6.11307	1.90263	1.48777	3.15103	1.46753
GH_A10G1967	3.16377	3.13263	1.911	0.815933	1.18813	1.24207	0.3086	4.4142	5.52957	3.33543	0.992333	1.34253	1.16347	1.24313
GH_A10G2123	2.73243	1.7343	1.30837	1.03337	0.869067	0.7557	0.248733	2.75323	2.52867	2.82557	1.54297	0.6464	1.0132	0.9141
GH_A10G2630	1.31353	1.0174	1.22203	1.31353	1.13033	1.03963	0.582333	2.39087	1.8401	1.91857	1.77987	1.6152	0.934167	1.55903
GH_A11G0142	31.3322	28.4114	16.1201	8.33947	12.0922	12.0141	3.89583	32.9188	27.3647	17.3961	10.7002	8.2679	9.76073	8.6037
GH_A11G0252	1.597	0.757167	0.651933	0.4209	2.62377	2.45197	1.6996	2.18133	1.30237	0.850467	0.4205	1.58293	1.1531	1.12177
GH_A11G0261	4.77687	3.0657	2.0851	1.4731	3.32717	3.22917	1.477	4.1124	3.4432	3.1847	2.26673	2.94687	3.62153	4.0149
GH_A11G0279	5.74723	6.96327	5.2917	2.00717	4.61543	5.702	1.112	5.78313	6.1086	4.2444	2.4345	2.22983	3.65447	4.04153
GH_A11G0313	10.7317	10.7644	7.6157	2.25457	3.77963	3.67803	0.754767	9.7921	10.6675	8.5795	3.54867	3.77597	3.93	5.79663
GH_A11G0430	5.81693	4.73353	3.16027	2.37597	1.33793	1.17723	0.482033	4.6432	4.78613	3.70533	2.89633	1.231	1.17733	1.05873
GH_A11G0475	3.47093	3.0245	2.46967	0.840967	1.15897	0.8797	0.1797	3.3375	2.99013	2.27757	1.40107	0.922233	0.7072	0.860467
GH_A11G0637	1.59417	0.969367	0.815233	0.580333	1.69653	1.0594	0.256933	2.0112	1.03797	0.874167	1.05623	0.992467	1.3338	2.1274
GH_A11G0645	0.789967	0.5972	0.7243	0.5668	0.202133	0.2303	0.110133	0.8755	0.765067	0.6248	0.695133	0.4111	0.169133	0.2202
GH_A11G0741	1.39653	1.40847	0.7941	0.8718	0.545033	0.434133	0.118067	1.5656	1.0278	0.775133	0.6338	0.213967	0.3513	0.381133
GH_A11G0885	1.0623	0.944367	0.569533	0.382267	0.545533	0.3635	0.2288	0.9327	1.09463	0.7345	0.495033	1.02233	0.758967	1.10063
GH_A11G1121	3.77373	1.9439	1.31937	1.24643	2.17107	2.10457	0.3795	5.5158	3.04883	2.7341	1.76943	1.55003	2.77033	3.08693
GH_A11G1129	10.3526	4.2798	2.8556	1.88463	3.0725	1.91337	0.6499	7.60843	3.2518	3.42363	1.7471	1.64513	3.8643	1.8672
GH_A11G1338	1.523	1.44423	1.3585	2.0251	1.57887	1.73317	0.549967	0.770167	1.25787	1.23273	2.06853	1.5208	1.10177	1.22153
GH_A11G1386	2.90877	1.67673	1.26337	1.49147	1.78637	1.17593	0.3915	3.0333	2.04133	1.23263	1.62583	1.02393	0.978333	0.8703
GH_A11G1411	1.80053	1.65447	1.66623	1.48253	1.23283	0.750533	0.361233	1.69167	2.33567	1.8678	2.33223	1.05517	0.724433	0.839267
GH_A11G1454	14.5512	5.65357	3.65893	1.8234	3.6274	3.29947	1.0336	11.5849	5.77503	3.67653	1.65137	1.71477	3.65267	2.1407
GH_A11G1506	2.25267	1.695	2.7059	0.920567	0.716467	1.6692	0.137367	1.87367	1.77253	1.15457	1.02373	0.696967	0.940267	0.6602
GH_A11G1563	0.909167	0.7273	0.578767	0.4973	0.654967	0.635133	0.1357	0.955467	0.871467	0.639967	0.5121	0.538633	0.384067	0.465067
GH_A11G1596	1.74863	1.2052	0.952567	0.495567	0.341367	0.588867	0.110933	1.68663	1.40367	0.579367	0.527067	0.7576	0.537267	0.310067
GH_A11G2007	0.481633	0.7776	0.571933	0.351067	0.247233	0.292333	0.0295333	0.620633	0.6998	0.680333	0.602267	0.301467	0.3034	0.232667
GH_A11G2273	6.61967	2.66257	1.13823	0.825967	0.860533	1.3031	0.593533	8.70833	3.21073	1.3408	0.8196	1.20237	2.93453	2.624
GH_A11G2317	7.39013	3.69723	2.12497	1.06467	0.952767	1.38573	1.23067	17.4589	4.78007	1.70387	2.71603	1.53313	5.198	3.63517
GH_A11G2404	15.513	6.23037	4.158	1.85587	2.61673	2.73133	1.03797	16.8545	7.41107	4.05173	2.49973	2.75327	6.9079	4.61993
GH_A11G2437	1.27147	1.1246	1.08427	0.929167	1.0768	0.758933	0.163967	0.903167	0.956767	0.932633	0.816233	0.763733	0.727467	0.680567
GH_A11G2685	2.12603	1.26383	0.710033	0.372367	0.3129	0.4251	0.357667	2.1173	1.2102	0.7763	0.327467	0.490033	1.61973	1.12187
GH_A11G2780	1.13183	0.566667	0.4311	0.439767	0.5976	0.943033	0.029	1.17183	0.758667	0.562067	0.205767	0.2481	0.515567	0.3782
GH_A11G3048	1.00487	0.8488	0.9505	0.333633	0.387567	0.4295	0.1381	0.818367	0.740433	0.6782	0.4914	0.516067	0.568833	0.492033
GH_A11G3063	1.9528	1.05657	1.0281	0.383367	0.464567	0.4957	0.1443	2.13633	1.13593	1.20283	0.840067	0.428567	0.3514	0.328867
GH_A11G3089	2.58727	2.3432	1.79227	1.10673	1.0764	1.39653	0.452167	3.04843	2.4752	1.96257	1.63843	1.37703	1.6715	1.43653
GH_A11G3404	7.87653	1.5245	2.25903	1.5214	1.42007	2.4528	1.26473	5.5967	2.9143	1.3182	2.24953	4.30833	3.49993	2.60987
GH_A11G3406	1.3276	2.0836	2.04253	1.73947	0.886167	0.575867	0.3935	1.35153	1.95637	2.60123	2.17447	0.730933	0.562033	0.575667
GH_A11G3597	2.93613	2.02817	1.359	1.3265	1.2539	1.0662	0.393167	2.44253	2.1309	1.62737	0.915	0.5846	1.05513	0.825267
GH_A12G0046	4.46	3.26353	2.2303	0.919733	0.923	0.8925	0.0892	4.41663	3.57623	1.61347	2.0239	0.729033	1.0226	0.627567
GH_A12G0280	2.85083	2.9153	1.7389	1.0917	0.7312	0.8801	0.217	3.09207	2.11303	1.4842	0.952867	0.882667	0.927333	0.628733
GH_A12G0307	5.6035	2.18713	2.1991	1.1205	1.6669	1.78503	1.2827	9.44927	3.477	2.61287	1.12813	2.20133	3.26047	3.45927
GH_A12G0308	5.34527	2.6128	2.34903	1.15127	1.46747	2.02347	0.8673	5.87897	3.02277	3.09107	1.31127	1.67763	4.07567	4.16363
GH_A12G0348	1.8232	3.1303	3.3122	3.36047	2.4067	1.82903	0.987967	1.8023	2.7573	3.07257	3.7043	3.0509	1.7412	1.64047
GH_A12G0453	1.31413	0.945367	0.838267	0.7248	0.6281	0.6766	0.135167	1.53283	1.24493	0.955633	1.45193	0.727867	0.577233	0.5369
GH_A12G0478	6.7486	3.96817	3.37147	1.78077	3.71067	2.54423	1.17167	7.367	4.57217	3.53053	2.4948	2.89527	3.8702	5.01863
GH_A12G0485	1.4796	1.0528	0.8656	0.128033	0.4774	0.598167	0.127233	1.77697	1.22567	0.735367	0.183667	0.323033	0.465567	0.5394
GH_A12G0566	0.8449	0.784267	0.415167	0.4952	0.790267	0.683833	0.443567	0.889133	0.957533	0.742533	0.444633	0.652633	0.428133	0.4688
GH_A12G0676	3.2216	2.32963	2.12047	0.926333	1.04577	1.0562	0.1488	3.5271	3.19777	2.53697	1.1896	1.14387	1.05813	0.718333
GH_A12G0702	1.41577	0.9548	0.597033	0.3771	0.675733	0.614267	0.190967	1.36137	1.23803	0.520733	0.2544	0.3737	0.3297	0.3692
GH_A12G0912	2.6972	2.2687	2.99827	3.57557	1.1524	1.20797	0.736533	3.8941	2.09147	2.37603	2.96473	1.93257	1.82817	1.9297
GH_A12G0913	1.19057	1.35857	0.938233	0.8891	0.4869	0.647	0.225433	1.0778	1.57373	1.30277	0.817733	0.581133	0.4203	0.426967
GH_A12G1029	4.1252	3.1395	2.99613	1.86457	1.74897	1.91027	0.862633	3.6518	2.9001	2.95993	1.82667	2.0934	2.9792	3.6284
GH_A12G1231	4.22573	4.15973	3.2813	1.88657	1.54673	2.08463	0.351	3.8593	5.19223	3.38253	2.00467	1.08347	1.47643	1.34553
GH_A12G1399	2.49423	1.37383	0.870633	0.641533	1.1863	0.789667	0.350933	1.0786	1.24123	1.33133	1.51073	0.618467	0.8303	1.05233
GH_A12G1404	15.0195	10.8987	9.2079	4.9981	7.04767	8.06913	1.83783	19.4304	13.4471	13.2162	7.13783	5.47187	8.55017	6.85413
GH_A12G1570	5.64243	3.67437	2.64367	0.449233	1.68627	1.3878	0.529133	5.6048	3.142	1.40613	1.6842	1.2353	2.20973	1.56807
GH_A12G1596	1.9674	1.56683	0.6932	0.621133	0.237733	0.855033	0.158033	1.67397	1.7992	0.881167	0.469733	0.2899	0.428167	0.305133
GH_A12G1717	2.51833	2.86223	1.79897	1.0053	0.921467	0.847567	0.427433	2.79167	2.18873	1.6289	0.854	0.9867	1.7552	1.7946
GH_A12G1895	13.5269	7.53017	7.91273	1.19123	0.3065	0.632767	0.4577	11.7257	7.13147	5.80623	1.55333	0.864867	0.533133	0.651167
GH_A12G1958	1.67767	1.7726	1.99183	1.62817	1.41367	0.9365	0.9635	1.4305	1.4111	1.4025	2.01813	2.405	1.30163	1.06503
GH_A12G1983	0.716533	1.69017	1.2378	1.52633	1.0695	0.9651	0.9584	1.72243	2.08477	1.64913	2.1209	1.90557	1.39513	1.2547
GH_A12G2082	3.88297	2.59473	3.4284	2.87333	3.77417	4.53803	1.3236	3.36077	2.9677	3.17953	2.4393	3.98257	4.71067	3.49183
GH_A12G2300	3.45423	1.01433	0.389567	0.170767	0.362333	1.15517	0.0237667	2.76077	1.38177	0.852167	0.0771333	0.280867	0.915667	0.6345
GH_A12G2505	1.13717	0.5591	0.3747	0.679733	0.280033	0.371367	0.2457	0.8915	0.769267	0.614233	0.383367	0.274467	0.702067	0.473067
GH_A12G2650	6.02957	2.8499	2.23087	0.9479	2.25723	1.59223	1.0639	7.6949	4.10903	3.73783	1.34093	1.2611	1.81343	2.12687
GH_A12G2701	1.3306	0.908533	0.8775	0.4591	0.609533	0.693867	0.178933	1.2779	0.9076	0.761767	0.349267	0.521267	0.7144	1.01363
GH_A12G2741	1.24203	0.619933	0.6169	0.208033	0.356233	0.3336	0.0381667	1.00093	0.715533	0.527767	0.340967	0.587767	0.4526	0.6102
GH_A12G2777	7.38497	4.35877	3.23917	1.5188	2.71873	2.73313	0.6361	4.55647	3.80387	2.74053	1.82833	2.50193	3.64837	3.67957
GH_A13G0668	8.8158	8.80163	6.63217	3.66207	2.4092	2.2414	0.431033	8.2926	9.5933	6.23557	4.43687	2.28527	1.9887	1.85533
GH_A13G0784	0.791133	4.63003	9.47203	4.1897	0.829567	0.465733	0.455167	1.2572	4.53013	11.6701	9.63713	1.00543	0.5292	0.7517
GH_A13G0805	2.80383	2.51037	0.861267	0.744533	3.21557	1.77293	0.713467	2.0335	1.54887	1.3681	0.97	0.9824	3.3849	2.70407
GH_A13G0806	5.78917	3.31167	1.4267	1.701	4.06007	2.55977	0.974767	4.6881	2.36147	2.12883	1.51927	2.5728	3.61343	4.79017
GH_A13G0976	4.03843	2.4115	2.08893	1.3771	2.93857	3.0873	1.706	3.87007	2.27493	1.64503	0.5868	1.83803	4.43007	4.4152
GH_A13G1078	1.12277	0.679833	0.6682	0.434933	0.856433	0.6579	0.149533	0.8914	0.709367	0.625667	0.429333	0.805533	0.521567	0.695867
GH_A13G1216	8.64967	4.16683	2.66403	1.69907	1.25733	3.0628	0.7762	10.831	4.4406	3.19673	2.40763	1.67397	3.60273	2.81613
GH_A13G1608	1.1827	1.1045	0.7317	0.493433	0.515867	0.5368	0.146833	1.0007	0.695633	0.603267	0.492067	0.382733	0.588267	0.608433
GH_A13G1731	4.4637	1.7675	1.1594	0.575233	0.742633	0.721633	0.234667	6.0202	2.17623	1.31473	0.991333	0.835233	1.3704	1.51817
GH_A13G1766	1.6293	0.701467	0.324467	0.4115	0.674733	0.519633	0.120367	1.76977	0.7961	0.3366	0.450667	0.363033	0.748133	0.932367
GH_A13G2233	6.0166	6.14637	5.7055	2.7879	4.03473	3.5115	0.8497	6.6263	6.6053	5.69497	3.23747	3.21137	3.59133	2.7991
GH_A13G2370	8.17853	6.13313	5.3839	1.58197	2.61387	2.548	0.599067	8.58043	6.52447	5.64003	2.24237	2.0586	2.6382	1.98493
GH_A13G2465	9.3159	3.4467	3.5113	1.955	2.37433	3.30803	0.7161	9.73103	5.8712	3.65937	3.98897	2.34497	4.75267	3.80173
GH_D01G0060	7.818	6.677	4.882	2.61767	3.2531	3.1146	1.01753	9.3385	6.2519	5.22183	3.11827	2.5968	2.58543	2.4243
GH_D01G0150	1.2665	1.1648	1.03387	0.805	0.911633	0.635767	0.165933	1.92603	1.56553	1.35533	0.839433	0.880167	1.00917	0.7933
GH_D01G0304	3.53477	3.17113	2.53597	1.6936	2.0154	2.16067	0.483733	3.9658	4.2843	3.35167	1.7308	1.6813	1.6857	1.37167
GH_D01G0313	5.38907	3.04003	2.19413	0.666333	1.3831	2.06867	0.2514	5.80533	3.40397	2.1513	0.4772	0.9836	1.83103	1.96
GH_D01G0616	1.50583	1.5356	1.1465	0.795367	0.874867	0.870733	0.2057	1.48237	1.7785	1.54613	0.934467	0.6333	0.633967	0.530067
GH_D01G0717	3.61077	2.3368	1.23133	0.762767	0.895933	0.960433	0.477533	2.98917	1.83377	1.0058	1.00553	1.1056	2.8292	1.99767
GH_D01G0849	0.925133	0.5844	0.209533	0.353767	0.138567	1.1745	0.5498	1.60937	1.0992	0.572367	0.264533	0.439667	5.104	2.09197
GH_D01G1077	7.8512	3.33963	2.70127	1.61817	1.9691	1.77267	1.1897	8.51743	3.57963	2.46873	1.98427	2.3997	5.31767	3.30423
GH_D01G1100	2.52767	0.861533	1.16157	0.519633	0.690767	0.7169	0.238933	3.06953	1.31123	0.9574	0.5346	0.500533	1.00053	0.805767
GH_D01G1406	0.6126	1.0588	0.786867	0.4367	0.476133	0.539567	0.3534	0.713333	1.0685	0.7861	0.326833	0.336233	0.298667	0.206
GH_D01G1664	2.44767	1.71863	0.671067	0.370567	0.551067	0.278333	0.0677	2.16527	1.1059	0.7915	0.4627	0.6068	0.990467	0.687767
GH_D01G1790	3.26103	1.4707	1.32267	1.10493	1.46907	0.532833	0.9955	5.06053	2.06427	1.33483	1.1452	1.6646	2.87687	2.7201
GH_D01G2297	2.92057	1.78927	1.502	1.21373	1.3114	1.1823	0.253867	3.85213	3.2697	2.7656	1.34337	1.00407	1.19763	1.3016
GH_D01G2321	0.508	0.425267	0.408367	0.8517	0.640633	0.428333	0.2413	0.352967	0.5094	0.513	0.502533	0.555633	0.266233	0.301133
GH_D01G2363	2.5372	2.33777	1.76843	1.18617	1.1764	1.35863	0.3048	3.02157	2.93687	1.93573	0.9326	0.875267	1.0813	1.1175
GH_D01G2396	2.00793	1.8161	1.03007	0.8208	0.9912	0.807467	0.216667	2.16877	1.49337	1.37677	0.617367	0.868833	0.692433	0.7861
GH_D01G2405	2.21217	2.49123	1.71157	0.789867	0.950633	1.1695	0.410233	1.85373	1.49087	1.2007	1.07213	0.877433	1.36013	1.01777
GH_D01G2574	3.4529	1.87367	1.338	1.08433	1.0924	1.23117	0.140067	2.59163	1.9566	2.14027	1.25503	1.05963	1.462	1.88947
GH_D02G0079	2.89493	1.6291	1.7421	0.529633	1.38163	1.386	0.188033	1.99637	2.3819	1.54953	0.5129	1.17077	1.01353	0.9714
GH_D02G0120	1.34727	2.29327	2.98217	5.39697	2.35003	2.12883	1.91953	1.3046	2.47053	2.6502	3.6818	1.86947	1.10937	1.2743
GH_D02G0221	1.95277	1.3281	1.556	1.50807	0.981633	1.19107	0.734933	1.6247	1.56063	1.62297	1.51177	1.1401	0.752967	0.789367
GH_D02G0462	3.99913	2.069	2.2257	3.97513	4.77957	3.5739	6.3385	4.4732	3.29657	2.81337	5.10187	6.28613	6.71593	10.0318
GH_D02G0476	0.5918	0.477433	0.407467	0.4116	0.4626	0.254267	0.250933	0.517167	0.404067	0.4047	0.3129	0.788767	0.395367	0.5855
GH_D02G0758	1.1725	0.629867	0.595633	0.373367	0.6393	0.8391	0.216067	1.19457	0.725067	0.583167	0.4292	0.476533	0.558767	0.2998
GH_D02G0759	0.508433	0.665167	0.746267	0.771333	0.3699	0.338833	0.225367	0.6247	0.4168	0.546233	0.4033	0.309767	0.3333	0.244267
GH_D02G1089	1.0905	1.27577	1.3087	2.91377	1.14467	0.704333	0.788067	1.02317	1.23503	1.19053	2.6484	1.16767	0.880933	0.753267
GH_D02G1264	1.42493	0.6407	0.613133	0.785233	1.1277	0.8859	1.7572	1.42747	0.994633	1.0176	1.06663	0.8678	1.02057	1.24957
GH_D02G1269	6.50993	3.4346	1.4206	1.56203	0.856633	1.5012	1.2814	9.53413	3.53673	1.9161	1.25537	1.486	2.33057	1.52433
GH_D02G1393	1.03793	0.7625	0.807233	0.272	0.3635	0.301967	0.0969	1.2255	0.942433	0.78	0.509067	0.387933	0.323067	0.307733
GH_D02G1412	18.3333	32.0338	20.58	14.0871	15.6718	15.0088	8.14987	21.6212	30.0593	22.1493	13.6326	13.5373	11.9677	12.8495
GH_D02G1767	1.21967	0.487967	0.3607	0.342367	0.919067	0.1586	0.276967	1.45773	0.737067	0.134233	0.240433	0.3847	0.973833	0.5862
GH_D02G1835	3.67657	4.33443	3.54823	3.0406	2.37467	1.9771	1.40707	3.80003	4.75643	4.0162	4.92997	2.9534	1.92717	2.47663
GH_D02G1881	6.7126	6.09533	5.0938	4.04713	4.69647	4.8105	3.04587	3.99773	4.22607	4.5366	4.52533	6.62037	4.31637	5.09687
GH_D02G1983	3.78793	4.0083	3.79567	2.67197	5.06207	4.3593	1.3147	5.36023	3.6293	3.5322	4.30627	4.28587	3.44907	4.51957
GH_D02G1987	1.8687	1.38533	0.582733	0.5828	0.666333	0.564133	0.1212	1.97213	1.50813	0.912767	0.7812	0.450333	0.635633	0.3363
GH_D02G2252	6.8499	3.8152	2.44533	3.4817	9.51823	9.29703	4.01517	6.75927	4.31077	3.4962	3.3676	6.2127	8.9963	7.32733
GH_D02G2328	2.8274	2.76157	2.1444	1.44113	1.41467	1.906	0.476133	2.49033	2.7888	1.82287	1.41037	1.4237	1.58907	1.50967
GH_D02G2446	7.9698	5.54563	5.17343	3.0741	2.77243	2.9596	1.3408	7.17713	6.28523	7.00163	4.2076	3.189	2.01337	2.2432
GH_D03G0036	6.50133	6.90073	6.20933	4.21823	5.26957	4.9075	1.7322	6.7741	7.49137	6.2681	4.33333	4.33083	4.5511	4.87287
GH_D03G0120	3.69083	3.64203	3.9238	5.06817	3.71233	2.7538	1.44243	3.2876	3.87853	3.88477	4.1336	3.72747	2.07757	2.1215
GH_D03G0512	3.63463	1.9274	1.3745	0.455433	0.8095	1.0158	0.191167	3.22707	1.73247	1.6909	0.687533	0.759867	1.3782	1.1672
GH_D03G0679	2.8027	3.02643	3.58	4.8333	2.4927	1.45597	0.836667	2.42753	3.13153	2.4329	6.492	2.36407	2.4146	1.73153
GH_D03G0699	1.23973	1.33457	0.820667	0.546	0.836133	0.534433	0.109333	0.963433	0.6099	0.660567	0.511667	0.636067	0.737333	0.479367
GH_D03G0777	2.27707	1.38483	0.810067	0.4404	0.3941	0.6029	0.1566	2.259	1.45367	0.9266	0.428767	0.3592	0.5386	0.342033
GH_D03G1055	11.174	7.75337	5.68907	4.039	5.02227	5.21777	1.0623	9.04387	8.20287	6.61867	5.79763	4.89117	4.1719	3.6834
GH_D03G1079	1.46887	1.26567	1.04663	1.0711	0.8384	0.661267	0.177833	1.09757	1.54427	1.30977	0.907133	0.7316	0.6184	0.7591
GH_D03G1234	0.868433	1.17313	0.7468	0.483433	0.326967	0.3302	0.203	0.937067	0.960167	0.657267	0.643567	0.556133	1.05603	0.744033
GH_D03G1261	9.73887	7.66793	5.60883	3.28643	5.59773	4.7778	1.58527	8.20737	7.31887	5.6885	3.26543	4.3968	3.66257	4.65233
GH_D03G1540	8.05467	5.27693	3.91733	1.92923	2.27363	2.0143	1.7355	13.538	6.2634	4.9468	3.56067	2.91057	5.9318	4.6097
GH_D03G1962	1.13713	0.452467	0.616133	1.1261	0.533333	0.840033	0.5628	1.1339	0.5341	0.5385	0.5917	0.7811	1.6654	2.11537
GH_D04G0077	2.2448	2.42323	2.28937	1.18737	1.50153	1.70103	0.5929	2.6617	2.90663	2.91617	1.63357	1.36917	1.43267	1.65613
GH_D04G0120	11.8529	24.4201	20.3494	16.7653	12.8177	9.95303	6.3381	10.6379	24.6442	22.1912	16.6652	10.5921	6.99027	8.25033
GH_D04G0126	1.54477	1.12563	0.762767	0.342133	0.6626	0.7177	0.367967	1.29377	1.07467	0.550267	0.287133	0.754667	2.27007	1.86063
GH_D04G0201	0.475	0.4966	0.591333	0.4901	0.3415	0.470967	0.0734	0.5135	0.4781	0.3132	0.408567	0.240333	0.311067	0.238733
GH_D04G0280	1.2526	1.5118	0.830333	0.250633	0.491433	0.326667	0.246133	1.2763	1.02627	0.797	0.5959	0.7584	1.19813	1.053
GH_D04G0367	10.3037	4.29633	4.78717	4.8387	7.73383	5.14363	2.92593	9.03533	4.51757	4.42463	3.76057	3.76347	5.9181	6.33373
GH_D04G0469	1.92593	1.65983	1.1859	0.760467	1.1302	0.7385	0.2792	1.08013	1.20217	0.5142	0.5434	0.695967	0.6761	0.649833
GH_D04G0757	1.6318	1.3567	1.057	0.684633	0.707633	0.9075	0.1162	1.26087	1.03947	0.821333	0.680533	0.5394	0.5195	0.394933
GH_D04G0783	6.22967	4.86677	4.26593	3.8297	5.0795	5.36827	1.1047	4.7904	4.25573	4.10197	3.1796	2.91843	3.83437	2.44237
GH_D04G0793	6.95987	2.93577	1.92827	0.8152	1.11577	1.39757	0.378267	7.8459	3.0995	1.50773	0.876033	1.42647	3.59203	2.9749
GH_D04G0838	7.07633	1.77617	1.40123	0.640533	1.12257	1.91213	0.225667	6.9385	2.94353	2.40403	0.8974	1.1951	2.04277	2.8321
GH_D04G1290	0.948733	0.4839	0.3142	0.570767	0.682267	0.441933	0.792567	1.2503	0.554467	0.3698	0.644067	1.31077	0.800533	1.0171
GH_D04G1326	8.64653	5.2477	4.5011	2.4308	4.17637	4.36973	0.8735	6.35747	5.59707	5.25693	2.08837	2.34243	3.08173	2.89347
GH_D04G1511	2.464	2.13097	1.37193	0.942533	0.8254	0.725433	0.2059	2.3935	1.9014	1.52863	0.769167	0.626567	0.785567	0.5
GH_D04G1607	4.45493	4.4053	2.54693	1.64827	2.5742	2.253	0.6039	5.94593	3.43123	3.2413	3.20817	2.5593	2.9165	3.3117
GH_D04G1682	2.71897	2.2135	1.38763	1.65177	1.6176	1.35287	0.319167	1.82593	1.63373	1.7779	1.93403	1.61567	1.256	1.4308
GH_D04G1756	9.09227	5.96467	3.64083	2.01433	3.7384	3.75753	0.974	7.1691	4.8281	3.8202	1.95777	3.4466	6.8682	6.2626
GH_D04G1868	2.72183	1.60457	0.6938	0.548667	0.818233	0.6671	0.1566	2.19733	1.37113	0.679133	0.4183	0.5618	1.11183	0.8797
GH_D04G2090	5.1018	5.67837	5.86523	2.20473	4.6964	5.6041	1.60773	11.2573	8.80193	5.8049	4.11637	5.11973	6.3082	5.54993
GH_D04G2120	0.607067	0.969833	1.01533	1.19723	0.454433	0.296233	0.0705333	0.803	0.9499	0.881933	1.23893	0.336833	0.308133	0.3192
GH_D05G0029	0.596	0.349333	0.1874	0.1707	0.131933	0.3166	0.108867	0.741833	0.4244	0.267267	0.1346	0.151667	0.7168	0.381267
GH_D05G0040	14.1135	7.68743	6.484	2.48033	3.81513	5.28327	0.849067	14.8799	8.85907	6.8025	2.98627	2.849	4.44123	4.16173
GH_D05G0055	2.17487	1.4397	1.43897	0.7836	0.5839	0.615033	0.307733	1.7329	1.2136	0.957433	1.71783	1.005	1.6599	1.5747
GH_D05G0093	1.0107	1.19283	0.943867	0.7374	0.822767	0.830167	0.173067	0.637633	0.989433	0.862567	0.5477	0.647133	0.612233	0.4587
GH_D05G0206	2.104	1.45617	1.1308	0.470033	0.8969	0.7186	0.1059	1.7014	2.1906	1.16427	0.335867	0.666233	0.5323	0.543967
GH_D05G0611	4.32857	3.43417	2.72887	1.5267	2.59433	2.6045	0.576367	4.04533	2.8402	2.86987	1.6213	1.78593	2.5875	2.46213
GH_D05G0651	3.89187	1.6094	1.5403	3.8348	3.5903	1.8941	2.89003	4.079	2.00463	1.21003	1.2279	11.9942	3.1984	2.5352
GH_D05G0702	1.28527	0.8792	0.783733	0.4189	0.435333	0.355	0.376933	1.72393	1.23403	0.719967	0.344133	0.721	0.858967	1.00373
GH_D05G0890	2.2924	2.39633	2.5191	1.52637	1.56297	1.393	0.3085	2.14993	2.10653	1.95453	1.55313	1.247	1.05123	0.905567
GH_D05G0919	16.892	10.1611	9.73363	8.48347	9.39027	8.93373	3.1174	14.483	11.0191	10.8027	12.2469	10.843	10.6954	9.1575
GH_D05G1060	18.6742	14.5228	14.6195	14.6042	15.3694	12.1872	5.79917	16.273	13.6955	15.0417	14.7571	13.1096	8.73667	9.7438
GH_D05G1081	9.1578	7.30993	7.7898	8.01887	23.3001	17.794	12.7277	9.46203	7.2289	9.851	10.8213	20.2768	19.0614	23.6931
GH_D05G1234	1.13113	0.899167	1.4634	2.1143	2.19207	1.0388	0.672	1.53113	2.1665	1.403	2.36593	3.39897	6.72053	3.90633
GH_D05G1557	4.4122	3.5391	4.52407	2.86683	3.4209	3.20943	1.08877	5.1552	3.9978	4.34613	3.84067	2.4449	2.85563	2.4487
GH_D05G1603	1.9284	1.31943	1.32447	1.12443	1.5441	1.23863	0.790833	2.10037	1.9453	1.88057	1.34037	1.09827	0.804733	1.20667
GH_D05G1679	1.40783	1.30083	1.1434	0.755067	0.695767	0.625133	0.2406	1.53907	2.0639	1.45567	0.8928	0.960733	0.4626	0.7909
GH_D05G1721	3.19067	2.9764	2.35823	2.38753	2.65453	2.44103	0.807367	2.57647	1.89467	1.9299	2.18163	1.54373	2.7179	1.89787
GH_D05G1810	2.6447	1.51393	1.5374	0.226567	0.767533	1.68003	1.3452	0.868333	0.501433	0.1586	0.178333	1.63267	0.9371	0.745433
GH_D05G1811	3.97577	1.30793	1.3033	0.184533	1.3011	2.89917	1.08963	1.3058	0.178333	0.717733	0.0892667	1.82427	1.1339	0.2877
GH_D05G1824	2.86713	2.24263	2.22957	1.4477	1.7419	1.97677	0.679533	2.18313	1.9094	1.6465	0.8034	0.841533	2.37297	2.3769
GH_D05G1934	1.96757	1.42733	1.3246	1.09417	1.2929	1.1486	0.346333	1.6033	1.43403	1.2291	1.50453	0.9302	1.38547	1.87743
GH_D05G1935	0.573	0.4817	2.00317	3.6624	9.16727	4.6088	2.01123	0.403867	0.4852	2.46347	1.4308	12.2967	4.6685	6.19353
GH_D05G2158	11.5244	6.4791	5.18143	5.33983	9.9749	7.54093	4.17497	9.9329	8.11307	8.7763	6.61633	11.3469	6.50393	9.37043
GH_D05G2245	4.01583	2.71127	2.42257	1.7813	2.61317	1.2415	0.432033	6.59673	3.03717	2.75867	2.059	1.7265	1.37357	2.06553
GH_D05G2555	12.4412	8.22617	6.92153	4.0416	5.94783	7.11027	2.15883	11.4765	12.8425	11.0385	5.07377	4.13447	5.87643	5.50957
GH_D05G2556	2.03233	1.83323	1.2005	0.602133	0.591	0.7722	0.230267	2.3903	1.70733	1.4557	0.7582	0.639067	0.652567	0.4805
GH_D05G2822	2.89697	3.4141	2.11337	2.11623	1.1964	1.4231	1.1072	2.29507	3.14063	1.73783	2.4115	1.431	0.9713	1.38283
GH_D05G3200	0.6781	1.215	1.11223	0.823433	0.434933	0.318667	0.0834333	1.19077	1.43867	1.3261	1.09443	0.4122	0.241967	0.266367
GH_D05G3496	6.22213	3.3209	2.3003	1.85077	4.04607	5.75317	2.0166	5.41113	3.31307	3.27717	1.81363	3.2908	5.5289	8.24287
GH_D05G3597	0.710467	1.32367	0.976433	1.29787	0.803467	0.946567	0.7774	1.0478	0.911933	0.8354	1.9254	0.648567	1.0244	1.2287
GH_D05G3692	1.88037	1.5161	2.06207	0.821767	0.439133	0.843767	0.119433	2.22623	1.71397	1.65063	0.953633	0.284933	0.488967	0.4431
GH_D05G3717	3.02433	2.38163	2.36897	0.887267	0.752767	0.7463	0.169	4.24207	2.68413	2.2091	1.17857	0.471433	0.6111	0.470067
GH_D05G4018	1.6342	0.792967	0.28	0.2245	0.1631	0.296467	0.229233	1.5722	0.616367	0.498367	0.299967	0.478233	0.957467	0.853033
GH_D05G4024	3.24203	2.58573	2.49153	1.88647	3.41277	2.74007	0.806133	2.3513	2.60917	2.48373	2.0501	2.0056	2.24837	2.35477
GH_D06G0074	21.2345	26.0162	16.9047	11.5477	9.81877	10.5004	2.9898	21.7768	24.6084	17.8697	16.6176	9.1671	10.3665	9.762
GH_D06G0291	0.751433	0.340467	0.180433	0.5383	0.2349	0.742	0.0515667	0.3705	0.138767	0.167767	0.539267	0.161867	0.349567	0.4047
GH_D06G0293	19.7192	12.5004	8.81507	4.95963	8.24617	10.9659	2.02977	15.4318	12.9601	10.6958	5.1023	5.61283	8.10147	5.5633
GH_D06G0658	4.11767	0.941133	0.441633	0.450167	0.992433	1.5307	0.6519	2.5899	0.703933	0.674167	0.6067	0.771533	1.37263	4.415
GH_D06G0691	0.8568	0.583233	0.571	0.784333	0.393867	0.4366	0.288533	0.624967	0.665567	0.391867	0.875767	0.841067	0.5766	0.602767
GH_D06G1257	2.9784	2.5181	1.19037	0.9503	1.12873	1.26673	0.385933	3.3135	2.95453	1.81237	1.03953	0.544433	0.889867	0.9076
GH_D06G1316	4.0999	5.40293	4.7654	3.9196	1.49913	1.2971	0.460767	3.29857	4.1911	3.3508	3.656	1.64787	1.93053	0.892933
GH_D06G1364	1.08833	1.0088	1.29577	1.14393	1.91167	1.07047	0.9152	0.9066	1.2612	1.2133	0.942833	1.3957	0.704033	0.979567
GH_D06G1389	0.418033	0.412467	0.3968	0.6659	0.4205	0.382233	0.237333	0.518133	0.596667	0.484567	0.409667	0.422267	0.435433	0.728467
GH_D06G1410	8.6075	7.57263	5.45547	3.4951	3.76157	4.02903	1.19527	5.3368	8.153	5.23133	3.47493	2.52363	3.34237	2.6676
GH_D06G1477	1.4438	1.69917	1.5169	1.42727	0.874	0.7384	0.508033	1.49103	1.8486	1.32837	2.0042	0.987267	0.698967	0.654667
GH_D06G1779	1.9378	1.5696	1.37547	0.667633	1.35123	1.02273	0.3397	1.98503	1.54807	1.46597	0.804333	0.915233	0.997433	1.04123
GH_D06G2069	4.03067	2.57793	1.7681	1.44073	1.21427	1.49563	0.4247	4.67507	2.9894	1.64093	1.01947	0.740633	0.888667	0.7781
GH_D06G2157	0.9409	0.6281	0.395167	0.1032	0.227467	0.213333	0.128433	0.861167	0.2658	0.139133	0.138633	0.290533	0.222033	0.114467
GH_D06G2172	3.52237	2.89847	2.64013	1.69697	1.17467	1.71157	0.383767	4.0944	3.10223	2.7025	2.57683	2.01877	2.35607	2.1951
GH_D06G2189	2.1062	0.7125	0.339067	0.3677	0.9034	0.4354	0.241467	1.70027	0.890933	0.6103	0.402567	0.530467	0.852133	0.209533
GH_D06G2403	44.9285	26.0649	14.8319	10.8229	20.9175	18.131	5.1126	31.453	22.7748	18.7739	7.1688	9.55743	14.5782	11.4581
GH_D07G0223	9.10113	9.3787	7.8371	6.44277	11.1258	8.13527	4.03927	8.60823	8.9016	8.70063	8.0125	5.6632	6.22123	5.51557
GH_D07G0299	1.9764	1.39353	1.03173	1.23953	0.744667	0.516733	0.336833	2.30953	1.5639	0.9725	1.41923	0.5756	0.464067	0.498967
GH_D07G0404	2.31927	1.89823	1.38633	0.560967	1.05487	1.31517	0.277033	2.4632	2.03243	1.28687	0.977367	0.766767	0.9023	0.747967
GH_D07G0698	1.5508	0.762267	0.594567	0.381867	0.4567	0.617133	0.311867	1.87437	0.880833	0.635567	0.368367	0.761833	1.1684	1.35053
GH_D07G0995	4.08397	3.87973	3.4275	1.42903	1.67263	2.08397	0.5134	4.88673	4.5189	3.678	1.5467	1.61593	1.2822	1.6026
GH_D07G1064	4.69297	2.10503	1.1534	0.826033	1.34713	1.3592	0.2337	4.72333	1.7552	1.01673	1.456	0.9059	1.33997	1.23507
GH_D07G1175	1.3483	1.6475	1.00333	0.6622	0.418867	0.483533	0.114567	1	1.80043	1.07627	0.671233	0.3875	0.274633	0.232667
GH_D07G1269	5.6857	4.382	4.61893	2.92197	4.3696	4.5699	1.6115	4.85713	5.67047	5.0061	4.1311	3.7099	4.39293	4.7222
GH_D07G1283	5.84187	7.8953	4.55203	2.18943	2.1682	2.3142	0.8614	7.5039	8.08623	5.57363	2.3269	1.91833	1.68173	1.73683
GH_D07G1307	5.21537	8.9699	7.65073	7.1063	2.34727	2.8881	2.23093	3.78207	8.50073	8.37367	9.59577	6.3001	5.83923	4.90537
GH_D07G1333	1.26047	0.8419	0.7454	0.345667	0.445967	0.593367	0.042	1.2438	0.848767	0.472867	0.392833	0.324567	0.534433	0.244
GH_D07G1437	6.1896	11.7102	13.0404	18.3764	19.5995	15.9609	16.4962	5.7889	9.41687	12.6987	21.4558	18.0827	9.97837	14.0109
GH_D07G1500	1.1945	1.6299	2.80403	4.3351	4.04297	4.7754	2.50407	1.3301	1.75933	3.41083	5.97457	4.1898	3.81527	3.77127
GH_D07G1727	1.88547	1.84207	1.2238	0.649067	1.25133	0.991733	0.182567	1.75373	1.33057	1.0955	0.615633	0.9024	0.679633	1.19447
GH_D07G1926	1.859	1.28323	0.8418	0.418333	0.475267	0.744433	0.192167	1.59563	1.42097	0.7298	0.6447	0.5691	0.5176	0.581733
GH_D07G2057	3.16043	1.9747	1.7826	0.9646	1.04217	0.9005	0.288067	2.16177	2.13103	1.3484	1.0443	0.818833	0.695067	0.778
GH_D07G2282	2.4415	1.34143	1.05233	0.482867	0.601067	0.794167	0.228133	3.41007	2.48883	1.34517	0.74	0.5226	1.14133	0.9359
GH_D07G2382	2.73643	2.54923	1.42737	0.921767	2.96167	2.14453	1.63347	3.09447	2.198	1.50493	0.7026	3.61093	1.7379	1.16117
GH_D07G2456	1.1781	1.18797	0.7559	0.719	0.606233	0.766267	0.170467	0.8063	1.06757	1.15003	0.615833	0.487067	0.314033	0.583567
GH_D08G0448	2.70187	1.33507	1.73563	1.45267	0.7527	1.14237	0.5963	2.49107	1.81087	2.0624	1.2284	0.9682	1.74527	2.30937
GH_D08G0599	2.6863	1.55017	1.0339	0.409033	0.791367	0.762	0.265	1.9082	1.08967	0.802033	0.666567	0.845633	2.4135	2.32553
GH_D08G0633	10.6736	8.32817	6.99033	3.03677	8.13187	8.4105	1.33237	7.91837	7.0817	6.59007	3.266	3.0882	6.24533	5.15127
GH_D08G0653	2.1644	0.990467	0.896933	0.555767	0.634767	0.895767	0.312033	1.55947	1.12823	0.806833	0.367167	0.808433	0.822567	0.388433
GH_D08G0667	1.55557	0.7815	0.866567	0.850867	0.4563	0.412933	0.250533	1.18963	0.625133	0.611233	1.17343	0.697967	0.7903	0.741267
GH_D08G0736	5.01313	3.98737	2.24473	1.3225	1.88247	0.895567	0.5043	5.57217	3.69757	2.79167	3.6184	1.7474	1.30797	1.69613
GH_D08G0770	8.74813	10.2772	7.04437	4.27993	6.87437	6.86303	2.3037	8.72623	12.7906	9.55703	5.4825	5.46963	6.41103	6.8595
GH_D08G0807	2.8132	2.18903	1.12697	0.4149	0.462333	0.5503	0.1919	3.74007	3.51677	1.62463	0.776133	0.6843	0.3953	0.256133
GH_D08G0902	3.40173	3.01253	2.00197	1.9047	1.9362	1.6518	0.3922	4.2146	4.43043	2.65277	1.3812	1.06907	1.04633	0.894833
GH_D08G1032	1.601	2.6118	2.30643	2.58607	1.11357	1.14803	0.604133	2.33697	2.84693	2.8004	3.47623	2.0729	1.13953	1.27233
GH_D08G1808	1.0678	0.539267	0.3986	0.135467	0.199767	1.23317	0.0185333	0.933567	0.6576	0.5489	0.152233	0.0863333	0.412733	0.277733
GH_D08G1921	1.74697	1.2359	1.22807	0.738533	0.805667	0.658233	0.2194	1.69213	1.29773	1.25663	0.619067	0.350267	0.496833	0.391233
GH_D08G2539	1.8594	0.919367	0.853267	0.4494	0.3716	0.487533	0.2891	1.54687	0.890867	0.589933	0.7095	0.614833	1.49463	1.24657
GH_D08G2570	1.13553	0.876567	0.780567	0.226433	0.4924	0.460633	0.126367	0.987867	0.723533	0.6636	0.417567	0.4721	0.3226	0.285133
GH_D08G2579	1.37163	0.8913	0.5166	0.265133	0.179833	0.3033	0.1157	1.0587	1.27117	0.6487	0.373867	0.4761	0.393967	0.355967
GH_D08G2836	2.7734	2.17957	2.12743	2.9099	3.64587	1.96387	0.4705	2.25637	1.78833	2.09783	2.3505	1.5145	1.76063	2.79703
GH_D09G0030	4.53267	3.89023	3.13877	1.8656	1.82747	1.92637	0.5283	6.14243	4.37673	2.96647	1.96723	1.50177	1.52757	1.3162
GH_D09G0066	5.4981	1.9112	1.0831	1.10913	0.9738	0.987033	0.505533	4.92187	2.3023	0.9554	1.67397	1.45407	3.7977	2.60937
GH_D09G0115	1.37973	0.9774	1.29357	0.963367	1.05017	0.950233	0.259733	1.10647	0.765367	1.1046	0.818933	0.817267	1.33833	1.2908
GH_D09G0233	1.68033	1.46547	1.0567	0.5666	0.4386	0.405667	0.126067	1.86763	2.13417	1.12647	0.711933	0.2664	0.3419	0.3096
GH_D09G0300	1.9739	2.75553	1.1175	1.3798	1.018	1.081	0.230433	2.0717	3.93077	1.55717	1.2395	0.800767	0.9511	1.0157
GH_D09G0332	0.675533	0.490067	0.383233	0.118933	0.290467	0.196	0.142233	0.634967	0.423967	0.370667	0.0794667	0.115167	0.112633	0.142767
GH_D09G0558	5.72713	3.44893	1.55003	0.5167	1.0538	1.10467	1.55853	10.2654	4.48587	2.28307	1.4781	1.41077	6.53233	4.50877
GH_D09G0571	4.1469	6.667	7.72047	12.4458	6.24333	5.05447	3.2707	4.83193	4.9233	8.06743	13.6102	6.79493	4.82213	4.62097
GH_D09G0701	3.51983	2.48007	1.97687	1.56903	1.21233	1.28553	0.436533	2.76443	2.69387	1.77873	2.29773	1.03743	1.20427	1.329
GH_D09G0894	3.10523	1.66127	0.785167	0.4009	0.359433	0.666467	0.115367	2.71657	1.4343	1.39693	0.4189	0.328533	0.608467	0.2643
GH_D09G1120	4.53227	3.45993	2.50357	1.48047	1.64697	1.78013	0.586567	4.51803	3.9762	2.6567	3.04597	1.36883	1.74523	1.22483
GH_D09G1235	0.1836	1.67867	1.68087	1.16427	0.1796	0.823767	0.105033	0.2627	1.85243	1.92293	2.5358	0.865167	1.04873	1.41647
GH_D09G1637	9.43533	4.8305	3.04523	1.7641	4.22133	2.96723	1.01507	9.02473	4.28917	3.13817	1.64813	3.09677	5.36453	5.602
GH_D09G1710	2.9604	2.2643	2.0254	1.716	2.11513	2.1175	0.546167	3.9405	3.35777	2.3748	1.26507	1.83437	1.59283	1.54243
GH_D09G1929	0.3414	0.4278	0.440933	0.4907	0.364233	0.211233	0.309267	0.529567	0.431733	0.6178	0.846267	0.4084	0.2794	0.192333
GH_D09G2174	4.8888	2.5838	1.67913	1.0858	1.11303	1.50017	0.356933	5.45113	3.4339	2.52003	0.944067	0.9056	1.7047	1.0889
GH_D09G2365	4.80167	3.39697	2.55577	1.5302	1.7641	2.0937	0.684267	4.52283	3.24893	2.3356	1.47193	1.4645	1.828	1.6276
GH_D09G2520	1.86767	2.40703	1.37337	0.849367	0.640167	0.6	0.1592	1.87183	2.09287	1.27023	1.427	0.9393	0.6437	0.475467
GH_D09G2558	4.47313	3.0852	2.8284	1.24167	1.7577	1.83977	0.433333	6.68447	4.76833	3.327	1.88703	1.49917	1.74207	1.6671
GH_D10G0145	11.2806	10.89	10.4472	4.92957	4.75797	4.6206	1.18313	9.97103	12.6814	13.0228	6.8374	3.65057	3.99063	4.10863
GH_D10G0281	8.17233	6.10477	3.29283	2.1064	1.63027	1.2152	0.4979	7.2856	6.60677	2.66467	2.9849	1.59557	2.4807	1.63017
GH_D10G0386	1.33253	0.863267	0.684433	0.447567	0.352833	0.5491	0.130333	1.3889	1.07817	0.881767	0.356867	0.486133	0.379633	0.301333
GH_D10G0482	15.8427	18.6479	16.2251	16.7764	13.1819	14.6703	12.3138	16.0398	20.3911	16.7209	17.7072	11.5128	12.6994	11.3296
GH_D10G0672	0.5763	0.518933	0.4712	0.322167	0.2148	0.462567	0.2661	0.6327	0.418367	0.357233	0.389567	0.493433	0.495167	0.359
GH_D10G0886	1.40813	0.8008	0.295567	0.232467	0.288167	0.552967	0.138733	1.3494	1.0941	0.5602	0.367767	0.1553	0.581267	0.293467
GH_D10G1424	3.54543	4.07017	3.91623	3.97727	3.5955	3.08433	1.8949	2.3261	3.75373	4.47543	3.85387	3.03313	3.07497	3.53627
GH_D10G1438	1.2503	0.849833	0.584367	0.6519	0.2845	0.351433	0.2648	1.36783	0.622267	0.694467	0.513933	0.525567	0.612233	0.683067
GH_D10G1609	2.2501	1.9368	1.54387	0.653667	1.0051	0.896433	0.276333	2.62727	2.35773	1.5054	0.671067	0.714567	1.11237	1.07787
GH_D10G2022	9.5116	6.96987	5.22377	2.53947	4.08623	4.0748	0.642	8.99303	8.72187	7.0462	2.52313	2.0898	3.33697	3.40833
GH_D10G2068	4.48327	5.4224	3.1992	1.27153	2.80557	2.27313	1.16243	6.45303	6.7731	5.17263	1.82693	2.2709	1.91997	2.69897
GH_D10G2236	3.302	3.4535	2.22103	1.5538	1.54723	1.03663	0.5698	4.73047	3.90047	2.8337	2.4758	1.11667	1.05313	1.05237
GH_D10G2272	7.7049	4.18253	3.00853	1.7642	2.3996	2.65943	0.6393	9.48793	4.2461	2.5981	1.34923	1.83213	3.62443	2.98183
GH_D10G2273	4.13607	3.28047	2.2688	1.57373	2.29743	1.8715	0.496033	3.5281	3.6027	2.76663	1.31967	1.44447	1.49867	1.7874
GH_D10G2735	1.10527	0.824033	0.817067	0.469567	0.690033	0.6333	0.1839	1.98063	0.852467	0.812967	0.726167	0.545267	0.472567	0.550367
GH_D10G2781	4.33953	2.2047	1.74833	0.9355	1.09953	1.97973	0.5273	3.92397	1.8097	1.74027	0.967967	0.9183	2.66927	2.4123
GH_D10G2787	7.85227	3.42767	3.14813	2.74453	4.71907	3.43743	3.39733	6.23477	3.3101	2.9033	2.78117	7.50493	10.0608	9.56937
GH_D10G2794	1.52003	0.852	0.8429	0.9421	0.7196	1.00123	1.50423	2.48543	0.979567	1.02153	1.18717	1.35297	4.4351	3.15247
GH_D11G0271	1.82263	1.4092	1.14957	0.527733	0.8183	0.7427	0.362933	2.21293	2.0171	1.50747	0.7834	0.906133	2.0056	2.14787
GH_D11G0289	9.24297	7.2177	4.95993	1.8685	4.01677	4.38713	1.2624	9.4102	7.94757	5.00157	2.32107	2.126	5.3239	4.3088
GH_D11G0497	2.9876	2.32223	2.3711	1.7732	1.29133	1.17343	0.5456	3.1006	3.07483	1.79607	2.37963	2.22643	1.40313	1.37417
GH_D11G0665	0.979067	0.234833	0.188833	0.169667	0.475	0.418533	0.0820333	0.944533	0.356167	0.164433	0.199567	0.164833	0.448933	0.687733
GH_D11G0718	1.47333	0.757767	0.599267	0.348867	0.772033	1.24497	0.3385	2.11423	1.30597	0.606767	0.253333	0.402633	1.02397	1.21203
GH_D11G0773	2.43553	2.02	1.71087	1.88677	1.07183	0.9488	0.459433	2.42093	2.00807	1.87287	2.4115	1.12977	0.777367	0.6884
GH_D11G0868	4.39503	2.12857	1.083	1.04917	2.36913	1.4788	0.206633	2.11537	1.6934	0.966233	0.7583	0.3863	0.999967	0.459333
GH_D11G0920	1.23903	0.577167	0.479767	0.275433	0.295133	0.573633	0.157	1.21163	0.672467	0.475967	0.3052	0.6818	1.02353	0.8524
GH_D11G1150	5.4548	3.38223	2.72517	2.1377	3.8289	3.835	1.3227	5.2469	4.12237	4.54337	2.8331	2.73683	3.7062	3.78473
GH_D11G1159	10.3108	3.85987	2.6783	1.67817	4.68223	2.5612	1.1289	6.44403	3.6153	3.73787	2.4643	2.2783	5.8082	3.87817
GH_D11G1370	0.710567	1.11003	1.1551	0.697733	0.779767	0.675133	0.2512	0.807233	0.924667	0.743367	0.744633	0.6164	0.759367	0.703533
GH_D11G1479	11.1614	4.34667	2.0745	0.9995	1.92853	2.0903	0.741633	11.6367	4.9638	2.69417	0.677933	1.57827	2.32137	1.946
GH_D11G1538	1.42877	1.3294	1.73237	0.902667	0.952733	1.2302	0.147467	1.68927	1.0703	1.09537	1.01753	0.783933	1.02277	0.806333
GH_D11G1626	0.728233	0.493733	0.5501	0.692033	0.2993	0.374333	0.0954333	0.734567	0.843833	0.418167	0.550033	0.472	0.219267	0.215767
GH_D11G2047	0.192633	0.384367	0.375767	0.2133	0.313067	0.0671	0.170767	0.390533	0.2828	0.2738	0.220767	0.208467	0.287067	0.2641
GH_D11G2168	8.37053	4.2721	2.84243	1.42127	2.1974	1.8181	0.618067	9.81073	4.45177	3.02563	1.90677	1.91863	4.9306	3.61217
GH_D11G2461	8.80607	3.4419	2.0658	0.714733	0.630167	1.62773	0.244867	11.1275	3.75617	1.59097	0.821633	0.402367	2.7964	0.9553
GH_D11G2533	0.626533	0.702	0.424167	0.5084	0.9906	0.4689	0.193767	0.4749	0.644667	0.4655	0.592167	0.465067	0.6165	0.452867
GH_D11G2808	2.91617	1.3147	0.9399	0.445233	0.4339	0.658133	0.166	4.42753	2.1769	1.41087	1.17153	1.22367	1.90083	1.96657
GH_D11G2929	0.286633	0.504833	0.171833	0.347233	0.286033	0.171667	0.158667	0.253967	0.316767	0.217333	0.285467	0.289433	0.285467	0.3914
GH_D11G3078	1.6368	1.10793	1.65687	0.4533	0.320567	0.683067	0.1003	1.33423	0.998767	1.0094	0.6792	0.2443	0.737033	0.583633
GH_D11G3090	1.95743	1.91213	1.2733	0.568667	0.250033	0.454733	0.172733	2.5361	1.7744	1.0305	1.36937	0.400133	0.400933	0.302467
GH_D11G3103	0.743533	0.549267	0.385467	0.3876	0.159267	0.0812667	0.0451333	0.674067	0.488433	0.3475	0.402733	0.5332	0.3373	0.4338
GH_D11G3411	0.863933	2.0988	2.1519	3.0495	1.57573	0.930167	0.4691	0.9443	1.9031	2.33557	2.95743	1.2601	0.841767	1.1244
GH_D11G3618	1.6477	1.7046	1.48797	0.845933	0.658767	0.623133	0.1317	1.70267	1.49697	1.30783	0.845667	0.532867	0.516533	0.341333
GH_D12G0046	6.46643	6.2606	4.88647	3.23297	2.35527	1.83987	0.616433	6.11057	4.7454	3.41007	4.5031	2.3642	1.91287	1.87357
GH_D12G0137	1.3873	0.977567	0.653333	0.248833	0.4032	0.379267	0.110933	1.94527	1.19677	0.612367	0.298267	0.1523	0.247533	0.141967
GH_D12G0267	0.8321	0.526333	0.418267	0.1919	0.368	0.2264	0.0594667	1.4276	0.812133	0.5194	0.208533	0.235367	0.3789	0.1875
GH_D12G0362	2.28703	3.73523	3.40763	2.91463	1.8995	1.7811	0.949233	1.646	3.2012	2.6509	3.5039	2.11517	1.3957	1.49623
GH_D12G0491	6.63903	4.70447	3.24327	1.5545	3.02363	2.47927	0.799167	6.3847	4.521	3.6462	2.0274	2.17177	2.6277	2.7428
GH_D12G0499	1.68573	1.67307	0.948733	0.290533	0.667833	0.994733	0.290533	1.93153	1.2726	1.05913	0.162367	0.597733	0.909133	0.9865
GH_D12G0669	15.486	22.5019	15.3631	9.41093	8.44093	7.47507	3.44953	15.0853	22.573	16.5301	12.5145	7.46153	7.83827	8.51723
GH_D12G0687	4.3244	3.32097	2.62567	0.911367	1.49823	1.17683	0.180833	3.58203	4.17257	3.2835	1.9708	1.30473	1.13987	1.0544
GH_D12G0702	1.19223	0.663567	0.520333	0.748333	0.668333	0.633667	0.192233	1.12487	1.13313	1.04817	0.8472	0.382133	0.5283	0.694967
GH_D12G0709	1.8413	1.7417	1.32297	1.16203	1.41923	0.991367	0.613167	1.8174	1.84507	1.81993	0.735267	0.930567	1.08907	1.05597
GH_D12G0902	1.5939	1.16443	1.25157	1.02343	0.977767	0.679667	0.152733	1.74187	1.57513	1.44463	1.30093	0.6547	0.533833	0.666367
GH_D12G0903	1.14067	0.637767	0.499567	0.4829	0.222933	0.3384	0.0531	0.800267	0.860533	1.0511	0.3046	0.316767	0.473133	0.478467
GH_D12G1236	2.908	11.7124	10.9906	5.4894	2.18577	2.52523	0.523867	3.05897	8.5288	10.6874	5.25053	1.86163	1.45123	1.02897
GH_D12G1320	2.1438	2.0922	1.462	0.803333	0.659267	0.797133	0.270767	1.7122	1.90763	1.53773	0.637833	0.894333	0.683167	0.818967
GH_D12G1351	1.35113	2.59167	0.924933	0.932267	0.8811	0.533867	0.444667	1.23157	2.3739	1.33607	0.875033	0.6938	0.6008	0.670067
GH_D12G1415	3.31223	3.51237	3.19097	2.5526	3.65383	2.92113	1.01437	2.61173	2.85933	3.9033	2.86487	2.30227	2.88393	4.01127
GH_D12G1597	0.897867	0.9627	0.522567	0.5609	0.189467	0.330933	0.251167	1.61763	1.54903	0.699033	0.499733	0.4325	0.227667	0.2477
GH_D12G1713	3.04367	2.54903	1.68733	1.2536	0.874267	0.929433	0.423567	2.72543	2.00453	1.51523	1.58083	0.915667	1.96043	1.78667
GH_D12G1895	19.1647	9.6868	9.49513	1.13147	0.959967	1.29993	0.739367	16.8107	6.3328	4.55157	1.14617	1.3935	1.11767	0.485667
GH_D12G1954	2.99523	3.9717	3.8912	3.68783	2.986	3.024	3.78213	2.27403	3.01627	3.23837	5.34433	4.01437	2.66803	2.92347
GH_D12G1974	1.9277	1.30543	1.0007	0.470533	0.8812	0.816667	0.183433	3.23947	1.89657	0.932367	0.5361	0.7923	0.835067	0.642867
GH_D12G2084	8.83363	3.67383	4.28147	2.78377	4.66213	5.61963	1.1175	5.55657	4.6136	5.13583	2.51373	3.92677	3.99923	3.01883
GH_D12G2110	2.36523	2.35533	1.55477	0.7835	0.6824	0.4751	0.110633	3.25883	2.7011	1.90393	1.25193	0.716533	0.968633	0.829933
GH_D12G2232	1.76227	0.988333	0.895933	0.4635	0.4916	0.7524	0.112433	1.21723	0.821167	0.7435	0.414233	0.523533	0.539033	0.3549
GH_D12G2317	4.6867	2.8832	1.676	0.619933	0.778967	0.839233	0.0691667	3.60293	2.33637	1.9882	0.2747	0.2893	0.562933	0.665967
GH_D12G2331	1.0467	0.678033	0.484067	0.568467	0.369667	0.2668	0.0784	0.5724	0.469933	0.436633	0.5375	0.2303	0.583833	0.5041
GH_D12G2524	1.36407	0.681133	0.464467	0.505067	0.366467	0.470333	0.149533	1.0497	0.8049	0.7472	0.608067	0.503	0.955	0.7022
GH_D12G2673	7.4572	7.16593	7.24353	2.2676	2.35733	1.80193	0.724267	11.6292	9.2026	11.5962	2.6475	2.7053	7.88377	4.19353
GH_D12G2700	0.677767	0.870567	0.661667	0.3713	0.3333	0.372367	0.169833	1.03273	0.837433	0.4998	0.5576	0.2173	0.272767	0.352233
GH_D12G2728	1.28173	1.0246	0.667133	0.327533	0.496333	0.5858	0.0812333	1.45337	0.7741	0.684133	0.2923	0.310167	0.573633	0.596367
GH_D12G2804	7.52267	4.1103	3.2721	1.18517	2.7073	1.88413	0.5486	5.53967	3.97533	2.52287	1.50383	1.89533	2.62653	3.14693
GH_D13G0100	10.5908	8.29693	6.472	3.21113	4.16407	5.12483	1.74973	9.78557	8.42703	6.9542	3.56167	3.6769	4.8369	5.673
GH_D13G0389	19.9058	18.603	16.8686	9.52787	14.2736	13.4236	4.67387	21.4672	21.1543	17.8549	10.963	9.91147	9.62353	9.08197
GH_D13G0516	11.9152	12.4499	11.667	10.4769	8.4702	7.528	6.7383	11.204	10.531	8.84307	10.7949	6.2632	7.08397	6.45073
GH_D13G0597	10.8601	9.10167	6.49533	4.08653	3.41003	3.31773	0.9659	7.33967	9.71943	6.69063	5.40713	3.39967	2.55933	2.30697
GH_D13G0773	2.403	1.4128	1.15773	0.865467	3.33277	1.91973	0.6718	1.55307	1.49107	1.57733	0.840733	1.64837	2.76413	2.08273
GH_D13G1010	1.26697	0.670033	0.7443	0.631467	0.840767	1.3348	0.410867	1.09783	0.764167	0.735933	0.350867	0.785967	2.25093	2.3273
GH_D13G1030	0.807133	0.738233	0.6961	0.6901	0.9729	0.3943	0.1477	1.04183	0.7058	0.7681	0.8549	0.404233	0.401333	0.4063
GH_D13G1162	6.1384	3.34933	1.97363	1.2904	0.867433	1.19387	0.547667	7.86753	2.32093	1.70433	1.4052	0.886667	2.25767	1.30313
GH_D13G1210	2.92687	2.45973	3.5999	2.88827	2.13257	1.70157	1.0862	3.22097	2.67297	2.91937	3.99243	2.3893	1.47583	1.55993
GH_D13G1284	0.7968	0.5746	0.5523	0.4042	0.530067	0.412	0.581667	0.906433	0.605733	0.616467	0.418267	0.444933	0.333133	0.3745
GH_D13G1319	6.83	4.10863	3.4446	2.08433	2.54593	2.91557	0.546167	4.47667	3.4869	4.0596	2.93853	2.18647	3.07517	2.29003
GH_D13G1687	2.5698	1.15907	0.736933	0.410567	0.5159	0.2719	0.224167	3.50047	1.89343	0.8048	0.729233	0.753867	1.02093	0.945
GH_D13G1819	2.06863	1.4618	1.21013	0.698333	0.729233	0.845767	0.283767	1.75623	1.35563	1.3136	1.39187	0.926733	0.771333	0.8357
GH_D13G1914	15.334	11.0294	7.6823	4.9465	6.6875	7.31957	2.42487	12.5283	9.8151	6.28823	5.66313	6.65013	7.8882	6.94263
GH_D13G2180	3.12413	2.1506	1.22917	0.839667	0.781233	1.38257	0.466733	2.59817	1.75313	1.43433	1.4018	1.5827	1.75853	2.4161
GH_D13G2216	8.7313	6.18677	3.6838	2.6689	3.28133	2.97953	0.837767	7.17057	7.5449	5.10403	2.98453	2.3819	3.74723	2.91437
GH_D13G2363	8.1052	6.80617	5.66777	1.50813	2.40717	2.9267	0.637433	7.5163	6.49473	5.61627	2.04903	2.08833	2.07363	1.7389
GH_D13G2565	1.8212	1.56537	0.672833	0.499467	0.7843	0.5946	0.2871	1.73817	1.1344	0.698433	0.511533	0.9044	0.899833	0.887533
