# Supplementary figures and images for: Comparative Transcriptomic Analysis of Gossypium hirsutum Fiber Development in Mutant Materials (xin w 139) Provides New Insights into Cotton Fiber Development
Source: MDPI journal article supplement (doi:10.3390/plants13081127), 2024-04-17

Scale Free Topology Model Fit, signed  $R^2$

Scale independence

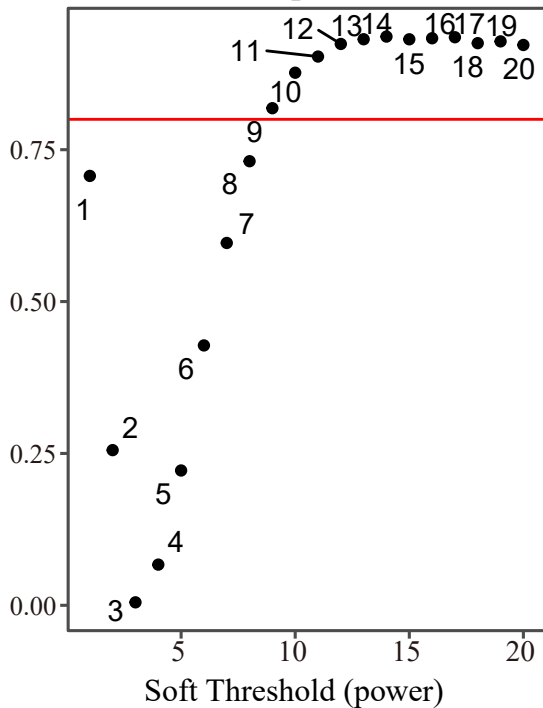

Mean connectivity

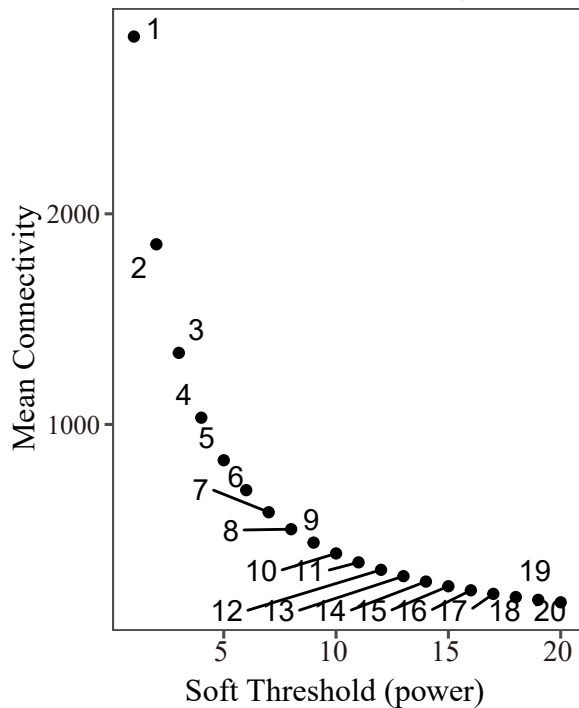

Supplement: s1 [file s1]

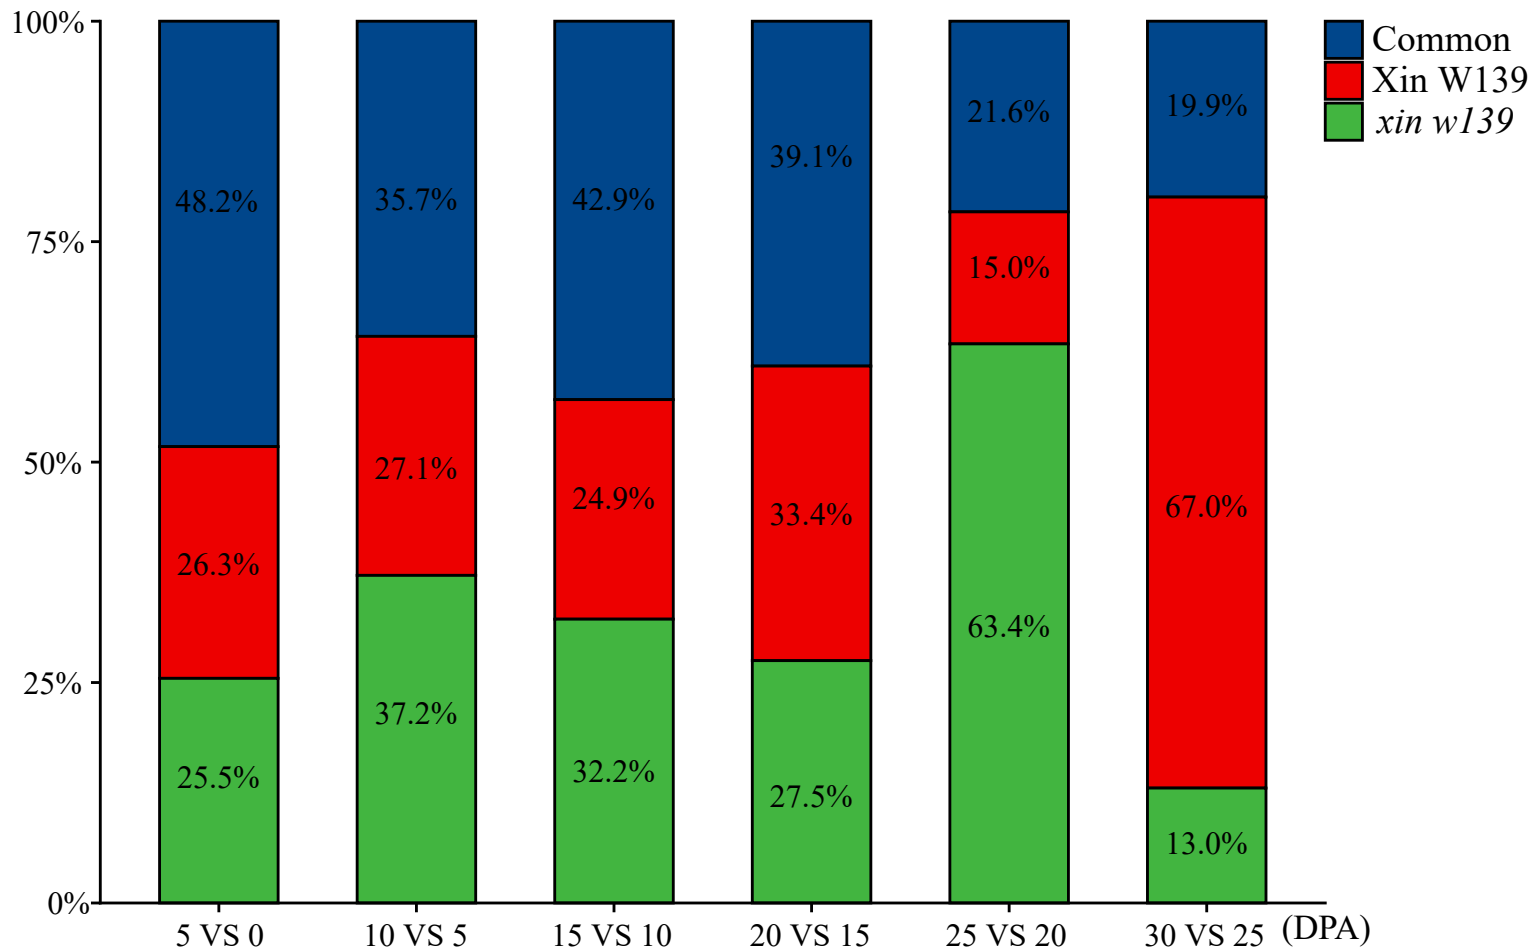

Supplement: s1 [file s1]

Plant height

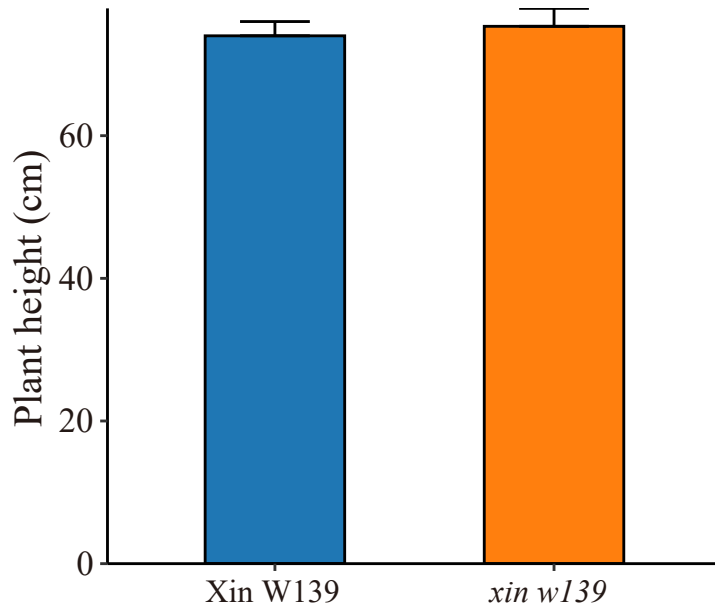

Number of fruit branches

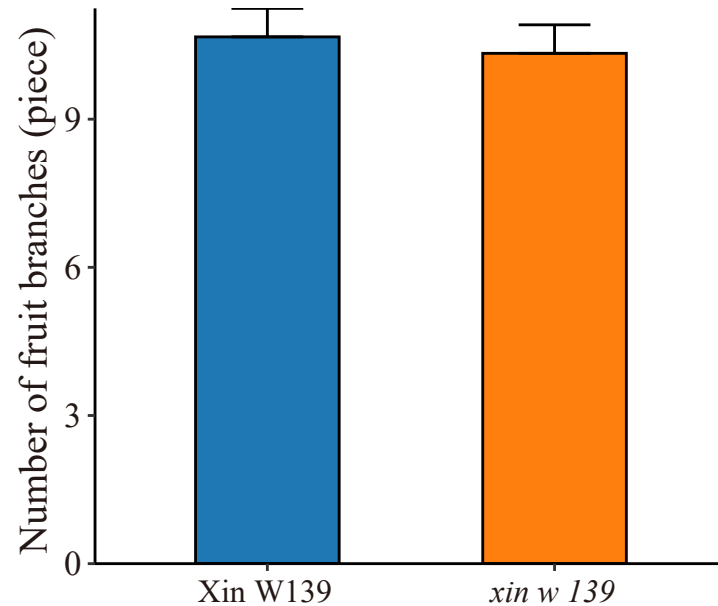

number of bells

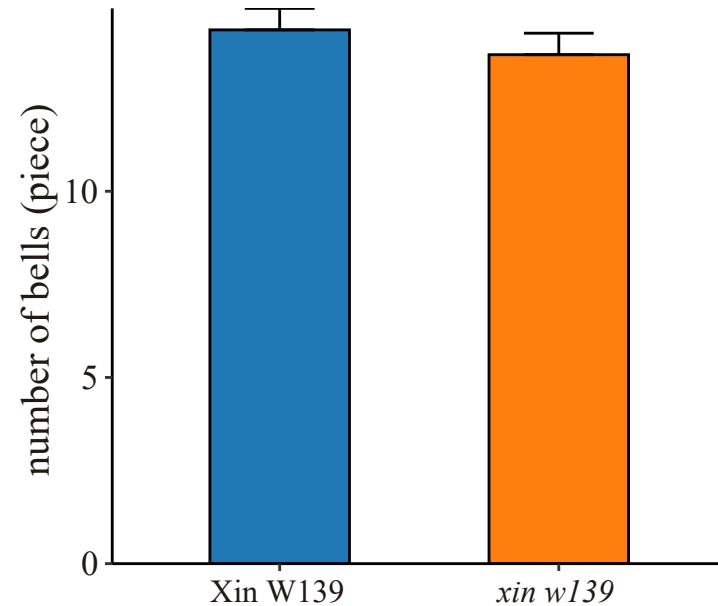

Supplement: s1 [file s1]
